# Supplementary material
Source: ML conference proceedings conference paper supplement (https://proceedings.neurips.cc/paper_files/paper/2023/hash/78ccee9dfbcf84840165ab4093715969-Abstract.html)
Supplement: Supplementary file 1 [file 78ccee9dfbcf84840165ab4093715969-Supplemental-Conference.pdf]

---

# When Can We Track Significant Preference Shifts in Dueling Bandits?

---

Anonymous Author(s)

Affiliation

Address

email

## Abstract

1 The  $K$ -armed dueling bandits problem, where the feedback is in the form of noisy  
2 pairwise preferences, has been widely studied due its applications in information  
3 retrieval, recommendation systems, etc. Motivated by concerns that user prefer-  
4 ences/tastes can evolve over time, we consider the problem of *dueling bandits with*  
5 *distribution shifts*. Specifically, we study the recent notion of *significant shifts* [30],  
6 and ask whether one can design an *adaptive* algorithm for the dueling problem with  
7  $O(\sqrt{K\tilde{L}T})$  dynamic regret, where  $\tilde{L}$  is the (unknown) number of significant shifts  
8 in preferences. We show that the answer to this question depends on the properties  
9 of underlying preference distributions. Firstly, we give an impossibility result that  
10 rules out any algorithm with  $O(\sqrt{K\tilde{L}T})$  dynamic regret under the well-studied  
11 Condorcet and SST classes of preference distributions. Secondly, we show that  
12  $\text{SST} \cap \text{STI}$  is the largest amongst popular classes of preference distributions where  
13 it is possible to design such an algorithm. Overall, our results provides an almost  
14 complete resolution of the above question for the hierarchy of distribution classes.

## 15 1 Introduction

16 The  $K$ -armed dueling bandits problem has been well-studied in the multi-armed bandits literature  
17 [34, 36, 31, 3, 37–39, 13, 18, 21, 22, 25, 11, 26, 2]. In this problem, on each trial  $t \in [T]$ , the learner  
18 pulls a *pair* of arms and observes *relative feedback* between these arms indicating which arm was  
19 preferred. The feedback is typically stochastic, drawn according to a pairwise preference matrix  
20  $\mathbf{P} \in [0, 1]^{K \times K}$ , and the regret measures the ‘sub-optimality’ of arms with respect to a ‘best’ arm.

21 This problem has many applications, e.g. information retrieval, recommendation systems, etc, where  
22 relative feedback between arms is easy to elicit, while real-valued feedback is difficult to obtain or  
23 interpret. For example, a central task for information retrieval algorithms is to output a ranked list  
24 of documents in response to a query. The framework of online learning has been very useful for  
25 automatic parameter tuning, i.e. finding the best parameter(s), for such retrieval algorithms based on  
26 user feedback [23]. However, it is often difficult to get numerical feedback for an individual list of  
27 documents. Instead, one can (implicitly) compare two lists of documents by interleaving them and  
28 observing the relative number of clicks [24]. The availability of these pairwise comparisons allows  
29 one to tune the parameters of retrieval algorithms in real-time using the framework of dueling bandits.

30 However, in many such applications that rely on user generated preference feedback, there are  
31 practical concerns that the tastes/beliefs of users can change over time, resulting in a dynamically  
32 changing preference distribution. Motivated by these concerns, we consider the problem of *switching*  
33 *dueling bandits* (or non-stationary dueling bandits), where the pairwise preference matrix  $\mathbf{P}_t$  changes  
34 an unknown number of times over  $T$  rounds. The performance of the learner is evaluated using  
35 *dynamic regret* where sub-optimality of arms is calculated with respect to the current ‘best’ arm.

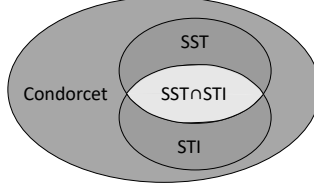

Figure 1: The hierarchy of distribution classes. The dark region is where  $O(\sqrt{K\tilde{L}T})$  dynamic regret is not achievable, whereas the light region indicates achievability (e.g., by our Algorithm 1).

36 Saha and Gupta [27] first studied this problem and provided an algorithm that achieves a nearly  
 37 optimal (up to log terms) *dynamic regret* of  $\tilde{O}(\sqrt{K\tilde{L}T})$  where  $L$  is the total number of *shifts* in  
 38 the preference matrix, i.e., the number of times  $\mathbf{P}_t$  differs from  $\mathbf{P}_{t+1}$ . However, this result requires  
 39 algorithm knowledge of  $L$ . Alternatively, the algorithm of [27] can be tuned to achieve a dynamic  
 40 regret rate (also nearly optimal)  $\tilde{O}(V_T^{1/3} K^{1/3} T^{2/3})$  in terms of the total-variation of change in  
 41 preferences  $V_T$  over  $T$  total rounds. This is similarly limited by requiring knowledge of  $V_T$ .

42 On the other hand, recent works on the switching MAB problem show it is not only possible to  
 43 design *adaptive* algorithms with  $\tilde{O}(\sqrt{K\tilde{L}T})$  dynamic regret without knowledge of the underlying  
 44 environment [7], but also possible to achieve a much better bound of  $\tilde{O}(\sqrt{K\tilde{L}T})$  where  $\tilde{L} \ll L$  is  
 45 the number of *significant shifts* [30]. Specifically, a shift is significant when there is no ‘safe’ arm  
 46 left to play, i.e., every arm has, on some interval  $[s_1, s_2]$ , regret order  $\Omega(\sqrt{s_2 - s_1})$ . Such a weaker  
 47 measure of non-stationarity is appealing as it captures the changes in best-arm which are most severe,  
 48 and allows for more optimistic regret rates over the previously known  $\sqrt{K\tilde{L}T} \wedge (V_T K)^{1/3} T^{2/3}$ .

49 Very recently, [10] considered an analogous notion of significant shifts for switching dueling bandits  
 50 under the  $\text{SST} \cap \text{STI}$ <sup>1</sup> assumption. They gave an algorithm that achieves a dynamic regret of  
 51  $\tilde{O}(K\sqrt{\tilde{L}T})$ , where  $\tilde{L}$  is the (unknown) number of *significant shifts*. However, their algorithm  
 52 estimates  $\Omega(K^2)$  pairwise preferences, and hence, suffers from a sub-optimal dependence on  $K$ .

53 In this paper we consider the goal of designing *optimal* algorithms for switching dueling bandits  
 54 whose regret depends on the number of *significant shifts*  $\tilde{L}$ . We ask the following question:

55 **Question.** *Is it possible to achieve a dynamic regret of  $O(\sqrt{K\tilde{L}T})$  without knowledge of  $\tilde{L}$ ?*

56 We show that the answer to this question depends on conditions on the preference matrices. Specifi-  
 57 cally, we consider several well-studied conditions from the dueling bandits literature, and give an  
 58 almost complete resolution of the achievability of  $O(\sqrt{K\tilde{L}T})$  dynamic regret under these conditions.

### 59 1.1 Our Contributions

60 We first consider the classical *Condorcet winner* (CW) condition where, at each time  $t \in [T]$ , there is  
 61 a ‘best’ arm under the preference  $\mathbf{P}_t$  that stochastically beats every other arm. Such a winner arm is a  
 62 benchmark in defining the aforementioned dueling *dynamic regret*. Our first result shows that, even  
 63 under the CW condition, it is in general impossible to achieve  $O(\sqrt{K\tilde{L}T})$  dynamic regret.

64 **Theorem 1.** (Informal) *There is a family of instances  $\mathcal{F}$  under Condorcet where all shifts are*  
 65 *non-significant, i.e.  $\tilde{L} = 0$ , but no algorithm can achieve  $o(T)$  dynamic regret uniformly over  $\mathcal{F}$ .*

66 Note that in the case when  $\tilde{L} = 0$ , one would ideally like to achieve a dynamic regret of  $O(\sqrt{KT})$ .  
 67 The above theorem shows that, under the Condorcet condition when  $\tilde{L} = 0$ , not only is it impossible  
 68 to achieve  $O(\sqrt{KT})$  regret, it is even impossible to achieve  $O(T^\alpha)$  regret for any  $\alpha < 1$ . Hence, this  
 69 rules out the possibility of an algorithm whose regret under this condition is sublinear in  $\tilde{L}$  and  $T$ .

70 The proof of the above theorem relies on a careful construction where, at each time  $t$ , the preference  
 71  $\mathbf{P}_t$  is chosen uniformly at random from two different matrices  $\mathbf{P}^+$  and  $\mathbf{P}^-$ . These matrices have  
 72 different ‘best’ arms but there is a unique *safe arm* in both. However, it is impossible to identify this  
 73 safe arm as all observed pairwise preferences are  $\text{Ber}(\frac{1}{2})$  over the randomness of the environment.  
 74 Moreover, the theorem gives two different constructions (one ruling out SST and one STI) which

<sup>1</sup>SST  $\cap$  STI imposes a linear ordering over arms and two well-known conditions on the preference matrices: strong stochastic transitivity (SST) and stochastic triangle inequality (STI).

75 together rule out all preference classes outside of  $\text{SST} \cap \text{STI}$ . Our second result shows that the desired  
 76 regret  $\sqrt{K\tilde{L}T}$  is in fact achievable (adaptively) under  $\text{SST} \cap \text{STI}$ .

77 **Theorem 2.** (Informal) *There is an algorithm that achieves a dynamic regret of  $\tilde{O}(\sqrt{K\tilde{L}T})$  under*  
 78  *$\text{SST} \cap \text{STI}$  without requiring knowledge of  $\tilde{L}$ .*

79 Figure 1 gives a summary of our results. Note that in stationary dueling bandits there is no separation  
 80 in the regret achievable under the CW vs.  $\text{SST} \cap \text{STI}$  conditions, i.e.  $O(\sqrt{KT})$  is the minimax optimal  
 81 regret rate under both conditions [26]. However, our results show that in the non-stationary setting  
 82 with regret in terms of significant shifts, there is a separation in adaptively achievable regret.

83 **Key Challenge and Novelty in Regret Upper Bound:** To contrast, the recent work of [10] only  
 84 attains  $\tilde{O}(K\sqrt{\tilde{L}T})$  dynamic regret under  $\text{SST} \cap \text{STI}$  due to inefficient exploration of arm pairs. Our  
 85 more challenging goal of obtaining the optimal dependence on  $K$  introduces key difficulties in  
 86 algorithmic design. In fact, even in the classical stochastic dueling bandit problem with  $\text{SST} \cap \text{STI}$ ,  
 87 most existing results that achieve  $O(\sqrt{KT})$  regret require identifying a coarse ranking over arms to  
 88 avoid suboptimal exploration of low ranked arms [35, 34]. However, in the non-stationary setting,  
 89 ranking the arms meaningfully is difficult as the true ordering of arms may change (insignificantly) at  
 90 all rounds. Our main algorithmic innovation is to bypass the task of ranking arms and instead directly  
 91 focus on minimizing the cumulative regret of played arms. This entails a new rule for selecting  
 92 “candidate” arms based on cumulative regret that may be of independent interest.

## 93 1.2 Related Work

94 **Dueling bandits.** The stochastic dueling bandits problem and its variants have been studied widely  
 95 (see [29] for a comprehensive survey). This problem was first proposed by [36], who provide an  
 96 algorithm achieving instance-dependent  $O(K \log T)$  regret under the  $\text{SST} \cap \text{STI}$  condition. [34] also  
 97 studied this problem under the  $\text{SST} \cap \text{STI}$  condition and gave an algorithm that achieves optimal  
 98 instance-dependent regret. [31] studied this problem under the Condorcet winner condition and  
 99 achieved an instance-dependent  $O(K^2 \log T)$  regret bound, which was further improved by [37] and  
 100 [21] to  $O(K^2 + K \log T)$ . Finally, [26] showed that it is possible to achieve an optimal instance-  
 101 dependent bound of  $O(K \log T)$  and instance-independent bound of  $O(\sqrt{KT})$  under the Condorcet  
 102 condition. More general notions of winners such as Borda winner [18], Copeland winner [38, 22, 33],  
 103 and von Nuemann winner [13] have also been considered. However, these works only consider the  
 104 stationary setting whereas we consider the non-stationary setting.

105 There has also been work on adversarial dueling bandits [28, 15], however, these works only consider  
 106 static regret against the ‘best’ arm in hindsight and whereas we consider the harder dynamic regret.  
 107 Other than the two previously mentioned works [17, 10], the only other work on switching dueling  
 108 bandits is Kolpaczki et al. [20], whose procedures require knowledge of non-stationarity and only  
 109 consider the weaker measure of non-stationarity  $L$  counting all changes in the preferences.

110 **Non-stationary multi-armed bandits.** Multi-armed bandits with changing rewards was first  
 111 considered in the adversarial setup by Auer et al. [5], where a version of EXP3 was shown to attain  
 112 optimal dynamic regret  $\sqrt{KLT}$  when properly tuned using the number  $L$  of changes in the rewards.  
 113 Later works established similar (non-adaptive) guarantees in this so-called *switching bandit* problem  
 114 via procedures inspired by stochastic bandit algorithms [16, 19]. More recent works [6, 7, 12]  
 115 established the first adaptive and optimal dynamic regret guarantees, without requiring knowledge  
 116 of the number of changes. An alternative parametrization of switching bandits, via a total-variation  
 117 quantity, was introduced in Besbes et al. [8] with minimax rates quantified therein and adaptive rates  
 118 attained in Chen et al. [12]. Yet another characterization, in terms of the number of best arm switches  
 119  $S$  was studied in Abbasi-Yadkori et al. [1], establishing an adaptive regret rate of  $\sqrt{SKT}$ . Around  
 120 the same time, Suk and Kpotufe [30] introduced the aforementioned notion of *significant shifts* and  
 121 adaptively achieved rates of the form  $\sqrt{K\tilde{L}T}$  in terms of  $\tilde{L}$  significant shifts in rewards.

## 122 2 Problem Formulation

123 We consider non-stationary dueling bandits with  $K$  arms and time-horizon  $T$ . At round  $t \in [T]$ , the  
 124 pairwise preference matrix is denoted by  $\mathbf{P}_t \in [0, 1]^{K \times K}$ , where the  $(i, j)$ -th entry  $P_t(i, j)$  encodes

the likelihood of observing a preference for arm  $i$  in a direct comparison with arm  $j$ . The preference matrix may change arbitrarily from round to round. At round  $t$ , the learner selects a pair of actions  $(i_t, j_t) \in [K] \times [K]$  and observes the feedback  $O_t(i_t, j_t) \sim \text{Ber}(P_t(i_t, j_t))$  where  $P_t(i_t, j_t)$  is the underlying preference of arm  $i_t$  over  $j_t$ . We define the pairwise gaps  $\delta_t(i, j) := P_t(i, j) - 1/2$ .

**Conditions on Preference Matrix.** We consider two different conditions on preference matrices: (1) the Condorcet winner (CW) condition and (2) the strong stochastic transitivity (SST) and stochastic triangle inequality (STI), formalized below.

**Definition 1.** (CW condition) At each round  $t$ , there is a **Condorcet winner arm**, denoted by  $a_t^*$ , such that  $\delta_t(a_t^*, a) \geq 0$  for all  $a \in [K] \setminus \{a_t^*\}$ . Note that  $a_t^*$  need not be unique.

**Definition 2.** (SST $\cap$ STI condition) At each round  $t$ , there exists a total ordering on arms, denoted by  $\succ_t$ , and  $\forall i \succeq_t j \succeq_t k$ :

$$(a) \quad \delta_t(i, k) \geq \max\{\delta_t(i, j), \delta_t(j, k)\} \text{ (SST).}$$

$$(b) \quad \delta_t(i, k) \leq \delta_t(i, j) + \delta_t(j, k) \text{ (STI).}$$

It's easy to see that the SST condition implies the CW condition as  $\delta_t(i, j) \geq \delta_t(i, i) = 0$  for any  $i \succ_t j$ . Hence, the highest ranked item under  $\succ_t$  in Definition 2 is the CW  $a_t^*$ . We emphasize here that the CW in Definition 1 and the total ordering on arms in Definition 2 can change at each round, even while such unknown changes in preference may not be counted as significant (see below).

**Regret Notion.** Our benchmark is the *dynamic regret* to the sequence of Condorcet winner arms:

$$\text{DR}(T) := \sum_{t=1}^T \frac{\delta_t(a_t^*, i_t) + \delta_t(a_t^*, j_t)}{2}.$$

Here, the regret of an arm  $i$  is defined in terms of the preference gap  $\delta_t(a_t^*, i)$  between the winner arm  $a_t^*$  and  $i$ , and the regret of the pair  $(i_t, j_t)$  is the average regret of individual arms  $i_t$  and  $j_t$ . Note that this regret is well-defined under both Condorcet and SST $\cap$ STI conditions due to the existence of a unique 'best' arm  $a_t^*$ , and is non-negative due to the fact that  $\delta_t(a_t^*, i) \geq 0$  for all  $i \in [K]$ .

**Measure of Non-Stationarity.** We first recall the notion of Significant Condorcet Winner Switches from Buening and Saha [10], which captures only the switches in  $a_t^*$  which are severe for regret. Throughout the paper, we'll also refer to these as *significant shifts* for brevity.

**Definition 3** (Significant CW Switches). Define an arm  $a$  as having **significant regret** over  $[s_1, s_2]$  if

$$\sum_{s=s_1}^{s_2} \delta_s(a_s^*, a) \geq \sqrt{K \cdot (s_2 - s_1)}. \quad (1)$$

We then define **significant CW switches** recursively as follows: let  $\tau_0 = 1$  and define the  $(i+1)$ -th significant CW switch  $\tau_{i+1}$  as the smallest  $t > \tau_i$  such that for each arm  $a \in [K]$ ,  $\exists [s_1, s_2] \subseteq [\tau_i, t]$  such that arm  $a$  has significant regret over  $[s_1, s_2]$ . We refer to the interval of rounds  $[\tau_i, \tau_{i+1})$  as a **significant phase**. Let  $\tilde{L}$  be the number of significant CW switches elapsed in  $T$  rounds.

**Notation.** To ease notation, we'll conflate the closed, open, and half-closed intervals of real numbers  $[a, b]$ ,  $(a, b)$ , and  $[a, b)$ , with the corresponding rounds contained therein, i.e.  $[a, b] \equiv [a, b] \cap \mathbb{N}$ .

### 3 Hardness of Significant Shifts in the Condorcet Winner Setting

We first consider regret minimization in an environment with no significant shift in  $T$  rounds. Such an environment admits a *safe arm*  $a^\#$  which does not incur significant regret throughout play. Our first result shows that, under the Condorcet condition, it is not possible to distinguish the identity of  $a^\#$  from other unsafe arms, which will in turn make sublinear regret impossible.

**Theorem 3.** For each horizon  $T$ , there exists a finite family  $\mathcal{F}$  of switching dueling bandit environments with  $K = 3$  that satisfies the Condorcet winner condition (Definition 1) with  $\tilde{L} = 0$  significant shifts. The worst-case regret of any algorithm on an environment  $\mathcal{E}$  in this family is lower bounded as

$$\sup_{\mathcal{E} \in \mathcal{F}} \mathbb{E}_{\mathcal{E}} [\text{DR}(T)] \geq T/8.$$

165 *Proof.* (sketch; details found in Appendix A) Letting  $\epsilon \ll 1/\sqrt{T}$ , consider the preference matrices:

$$\mathbf{P}^+ := \begin{pmatrix} 1/2 & 1/2 + \epsilon & 1 \\ 1/2 - \epsilon & 1/2 & 1/2 + \epsilon \\ 0 & 1/2 - \epsilon & 1/2 \end{pmatrix}, \mathbf{P}^- := \begin{pmatrix} 1/2 & 1/2 - \epsilon & 0 \\ 1/2 + \epsilon & 1/2 & 1/2 - \epsilon \\ 1 & 1/2 + \epsilon & 1/2 \end{pmatrix}.$$

166 In  $\mathbf{P}^+$ , arm 1 is the Condorcet winner and  $1 \succ 2 \succ 3$ , whereas in  $\mathbf{P}^-$ , 3 is the winner with  $3 \succ 2 \succ 1$ .  
 167 Let an oblivious adversary set  $\mathbf{P}_t$  at round  $t$  to one of  $\mathbf{P}^+$  and  $\mathbf{P}^-$ , uniformly at random, inducing an  
 168 environment where arm 2 remains safe for  $T$  rounds. Then, any algorithm will, over the randomness  
 169 of the adversary, observe  $O_t(i_t, j_t) \sim \text{Ber}(1/2)$  *no matter the choice of arms  $(i_t, j_t)$  played*, by  
 170 the symmetry of  $\mathbf{P}^+, \mathbf{P}^-$ . Thus, it is impossible to distinguish arms, which implies linear regret by  
 171 standard Pinsker's inequality arguments. In particular, even a strategy playing arm 2 every round fails  
 172 as arm 2 is unsafe in another (indistinguishable) setup with arms 1 and 2 switched in  $\mathbf{P}^+, \mathbf{P}^-$ .  $\square$

173 **SST and STI Both Needed To Learn Significant Shifts.** The preferences  $\mathbf{P}^+, \mathbf{P}^-$  in the above  
 174 proof violate STI but satisfy SST, whereas another construction using preferences  $\mathbf{P}^+, \mathbf{P}^-$  which  
 175 violate SST but satisfy STI also works in the proof (see Remark 2 in Appendix A). This shows that  
 176 sublinear regret is impossible outside of the class  $\text{SST} \cap \text{STI}$  (visualized in Figure 1).

177 **Remark 1.** Note the lower bound of Theorem 3 does not violate the established upper bounds  $\sqrt{LT}$   
 178 and  $V_T^{1/3}T^{2/3}$  scaling with  $L$  changes in the preference matrix or total variation  $V_T$  [17]. Our  
 179 construction in fact uses  $L = \Omega(T)$  changes in the preference matrix and  $V_T = \Omega(T)$  total variation.  
 180 Furthermore, the regret upper bound  $\sqrt{ST}$ , in terms of  $S$  changes in Condorcet winner, of [10] is not  
 181 contradicted either, for  $S = \Omega(T)$ .

## 182 4 Dynamic Regret Upper Bounds under SST/STI

183 Acknowledging that significant shifts are hard outside of the class  $\text{SST} \cap \text{STI}$ , we now turn our  
 184 attention to the achievability of  $\sqrt{K\tilde{L}T}$  regret in the  $\text{SST} \cap \text{STI}$  setting. Our main result is an optimal  
 185 dynamic regret upper bound attained *without knowledge of the significant shift times or the number*  
 186 *of significant shifts*. Up to log terms<sup>2</sup>, this is the first dynamic regret upper bound with optimal  
 187 dependence on  $T$ ,  $\tilde{L}$ , and  $K$ .

188 **Theorem 4.** Suppose SST and STI hold (see Definition 2). Let  $\{\tau_i\}_{i=0}^{\tilde{L}}$  denote the unknown significant  
 189 shifts of Definition 3. Then, for some constant  $C_0 > 0$ , Algorithm 1 has expected dynamic regret

$$\mathbb{E}[\text{DR}(T)] \leq C_0 \log^3(T) \sum_{i=0}^{\tilde{L}} \sqrt{K \cdot (\tau_{i+1} - \tau_i)},$$

190 and using Jensen's inequality, this implies a regret rate of  $C_0 \log^3(T) \sqrt{K \cdot (\tilde{L} + 1) \cdot T}$ .

191 In fact, this regret rate can be transformed to depend on the *Condorcet winner variation* introduced  
 192 in Buening and Saha [10] and the *total variation* quantities introduced in [17] and inspired by the  
 193 total-variation quantity from non-stationary MAB [8]. The following corollary is shown using just  
 194 the definition of the non-stationarity measures.

195 **Corollary 5** (Regret in terms of CW Variation). Let  $V_T := \sum_{t=2}^T \max_{a \in [K]} |P_t(a_t^*, a) - P_{t-1}(a_t^*, a)|$   
 196 be the unknown Condorcet winner variation. Using the same notation of Theorem 4: METASWIFT  
 197 has expected dynamic regret

$$\mathbb{E}[\text{DR}(T)] \leq C_0 \log^3(T) \left( \sqrt{KT} + (KV_T)^{1/3} T^{2/3} \right).$$

## 198 5 Algorithm

199 At a high level, the strategy of recent works on non-stationary multi-armed bandits [12, 32, 30] is to  
 200 first design a suitable base algorithm and then use a meta-algorithm to randomly schedule different

<sup>2</sup>It is unknown if log terms are avoidable for adaptive procedures, even in non-stationary MAB.

instances of this base algorithm at variable durations across time. The key idea is that unknown time periods of significant regret can be detected fast enough with the right schedule. In order to accurately identify significant shifts, the base algorithm in question should be robust to all non-significant shifts. In the multi-armed bandit setting, a variant of the classical successive elimination algorithm [14] possesses such a guarantee [4], and serves as a base algorithm in [30].

## 5.1 Difficulty of Efficient Exploration of Arms.

In the non-stationary dueling problem, a natural analogue of successive elimination is to uniformly explore the arm-pair space  $[K] \times [K]$  and eliminate arms based on observed comparisons [31]. The previous work [Theorem 5.1 of 10] employs such a strategy as a base algorithm. However, such a uniform exploration approach incurs a large estimation variance of  $K^2$ , which enters into the final regret bound of  $K\sqrt{T \cdot \tilde{L}}$ . Thus, smarter exploration strategies are needed to obtain  $\sqrt{K}$  dependence.

In the stationary dueling bandit problem with  $\text{SST} \cap \text{STI}$ , such efficient exploration strategies have long been known: namely, the Beat-The-Mean algorithm [34] and the Interleaved Filtering (IF) algorithm [35]. We highlight that these existing algorithms aim to learn the ordering of arms, i.e., arms are ruled out roughly in the same order as their true underlying ordering. This fact is crucial to attaining the optimal dependence in  $K$  in their regret analyses, as the higher ranked arms must be played more often against other arms to avoid the  $K^2$  cost of exploration.

However, in our setting, adversarial but non-significant changes in the ordering of arms could force perpetual exploration of lowest-ranked arms. This suggests that learning an ordering should not be a subtask of our desired dueling base algorithm. Rather, the algorithm should prioritize minimizing its own regret over time. Keeping this intuition in mind, we introduce an algorithm called **SWitching Interleaved FilTeriNg** (SWIFT) (see Algorithm 2 in Section 5.2) which directly tracks regret and avoids learning a fixed ordering of arms.

**A new idea for switching candidate arms.** A natural idea that is common to many dueling bandit algorithms (including IF) is to maintain a *candidate arm*  $\hat{a}$  which is always played at each round, and serves as a reference point for partially ordering other arms in contention. If the current candidate is beaten by another arm then a new candidate is chosen, and this process quickly converges to the best arm. Since the ordering of arms may change at each round, any such rule that relies on a fixed ordering is deemed to fail in our setting. Our procedure does not rely on such a fixed ordering over arms, but instead tracks the aggregate regret  $\sum_t \delta_t(a, \hat{a}_t)$  of the *changing sequence of candidate arms*  $\{\hat{a}_t\}_t$  to another fixed arm  $a$ . Crucially, the candidate arm  $\hat{a}_s$  is always played at round  $s$  and so the history of candidate arms  $\{\hat{a}_s\}_{s \leq t}$  is fixed at a round  $t$ . This fact allows us to estimate the quantity  $\sum_{s=1}^t \delta_s(a, \hat{a}_s)$  using importance-weighting at  $\sqrt{K \cdot t}$  rates via martingale concentration. An algorithmic *switching criterion* then switches the candidate arm  $\hat{a}_t$  to any arm  $a$  dominating the sequence  $\{\hat{a}_s\}_{s \leq t}$  over time, i.e.,  $\sum_{s=1}^t \delta_s(a, \hat{a}_s) \gg \sqrt{K \cdot t}$ . This simple, yet powerful, idea immediately gives us control of the regret of the candidate sequence  $\{\hat{a}_t\}_t$  which allows us to bypass the ranking-based arguments of vanilla IF and Beat-The-Mean. It also allows us to simultaneously bound the regret of a sub-optimal arm  $a$  against the sequence of candidate arms  $\sum_{s=1}^t \delta_s(\hat{a}_s, a)$ .

## 5.2 Switching Interleaved Filtering (SWIFT)

SWIFT at round  $t$  compares a *candidate arm*  $\hat{a}_t$  with an arm  $a_t$  (chosen uniformly at random) from an *active arm set*  $\mathcal{A}_t$ . Additionally, SWIFT maintains estimates  $\hat{\delta}_t(\hat{a}_t, a)$  of  $\delta_t(\hat{a}_t, a)$  which are used to (1) evict active arms  $a \in \mathcal{A}_t$  and (2) *switch* the candidate arm  $\hat{a}_{t+1}$  for the next round.

**Estimators and Eviction/Switching Criteria.** Let  $\mathcal{A}_t$  be the active arm set at round  $t$ . Let

$$\hat{\delta}_t(\hat{a}_t, a) := |\mathcal{A}_t| \cdot O_t(\hat{a}_t, a) \cdot \mathbf{1}\{(i_t, j_t) = (\hat{a}_t, a)\} - 1/2, \quad (2)$$

which is an unbiased estimator of the gap  $\delta_t(\hat{a}_t, a)$  when  $a \in \mathcal{A}_t$ . We *evict* an active arm  $a$  from  $\mathcal{A}_t$  at round  $t$  if for some constant  $C > 0$ <sup>3</sup> and rounds  $s_1 < s_2 \leq t$ :

$$\sum_{s=s_1}^{s_2} \hat{\delta}_s(\hat{a}_s, a) \geq C \log(T) \sqrt{K \cdot (s_2 - s_1)} \vee K^2, \quad (3)$$

<sup>3</sup>The constant  $C > 0$  does not depend on  $T$ ,  $K$ , or  $\tilde{L}$ , and a suitable value can be derived from the regret analysis.

246 where  $\hat{\delta}_s(a, \hat{a}_s) := -\hat{\delta}_s(\hat{a}_s, a)$ . Next, we switch the next candidate arm  $\hat{a}_{t+1} \leftarrow a$  to another arm  
 247  $a \in \mathcal{A}_t$  at round  $t$  if for some round  $s_1 < t$ :

$$\sum_{s=s_1}^t \hat{\delta}_s(a, \hat{a}_s) \geq C \log(T) \sqrt{K \cdot (t - s_1) \vee K^2}. \quad (4)$$

248 SWIFT is formally shown in Algorithm 2, defined for generic start time  $t_{\text{start}}$  and duration  $m_0$  so as to  
 249 allow for recursive calls in our meta-algorithm framework.

### 250 5.3 Non-Stationary Algorithm (METASWIFT)

---

#### Algorithm 1: Meta-Elimination while Tracking Arms in SWIFT (METASWIFT)

---

**Input:** horizon  $T$ .

```

1 Initialize: round count  $t \leftarrow 1$ .
2 Episode Initialization (setting global variables  $t_\ell, \mathcal{A}_{\text{master}}, B_{s,m}$ ):
3    $t_\ell \leftarrow t$ . ; //  $t_\ell$  indicates start of  $\ell$ -th episode.
4    $\mathcal{A}_{\text{master}} \leftarrow [K]$  ; // Master active arm set.
5   For each  $m = 2, 4, \dots, 2^{\lceil \log(T) \rceil}$  and  $s = t_\ell + 1, \dots, T$ :
6     Sample and store  $B_{s,m} \sim \text{Bernoulli}\left(\frac{1}{\sqrt{m \cdot (s - t_\ell)}}\right)$ . ; // Set replay schedule.
7 Run Base-Alg( $t_\ell, T + 1 - t_\ell$ ).
8 if  $t < T$  then restart from Line 2 (i.e. start a new episode). ;
```

---



---

#### Algorithm 2: Base-Alg( $t_{\text{start}}, m_0$ ): SWIFT starting at $t_0$ and running $m_0$ rounds

---

**Input:** starting round  $t_{\text{start}}$ , scheduled duration  $m_0$ .

```

1 Initialize (Global) Variables:  $t \leftarrow t_{\text{start}}, \mathcal{A}_t \leftarrow [K], \hat{a}_t \leftarrow \text{Unif}\{[K]\}$ .
2 while  $t \leq T$  do
3   Select a random arm  $a_t \in \mathcal{A}_t$  with probability  $1/|\mathcal{A}_t|$  and play  $(\hat{a}_t, a_t)$ .
4   Let  $\mathcal{A}_{\text{current}} \leftarrow \mathcal{A}_t$ . ; // Save current active arm set  $\mathcal{A}_t$  (global variable).
5   Increment  $t \leftarrow t + 1$ .
6   if  $\exists m$  such that  $B_{m,t} > 0$  then
7     Let  $m := \max\{m \in \{2, 4, \dots, 2^{\lceil \log(T) \rceil}\} : B_{m,t} > 0\}$ . ; // Set maximum replay length.
8     Run Base-Alg( $t, m$ ). ; // Replay interrupts.
9   if  $t > t_{\text{start}} + m_0$  then RETURN. ;
10  Evict bad arms:
11     $\mathcal{A}_t \leftarrow \mathcal{A}_{\text{current}} \setminus \{a \in [K] : \exists \text{ rounds } [s_1, s_2] \subseteq [1, t] \text{ s.t. (3) hold}\}$ .
12     $\mathcal{A}_{\text{master}} \leftarrow \mathcal{A}_{\text{master}} \setminus \{a \in [K] : \exists \text{ rounds } [s_1, s_2] \subseteq [1, t] \text{ s.t. (3) hold}\}$ .
13  if (4) holds for some arm  $a \in \mathcal{A}_t$  then
14    Switch candidate arm:  $\hat{a}_t \leftarrow a$ . ; // Set candidate arm  $\hat{a}_t$  (global variable).
15  else
16     $\hat{a}_t \leftarrow \hat{a}_{t-1}$ .
17  Restart criterion: if  $\mathcal{A}_{\text{master}} = \emptyset$  then RETURN.;
```

---

251 For the non-stationary setting with multiple (unknown) significant shifts, we run SWIFT as a base  
 252 algorithm at randomly scheduled rounds and durations.

253 Our algorithm, dubbed METASWIFT and found in Algorithm 1, operates in *episodes*, starting each  
 254 episode by playing a *base algorithm* instance of SWIFT. A running base algorithm *activates* its own  
 255 base algorithms of varying durations (Line 8 of Algorithm 2), called *replays* according to a random  
 256 schedule decided by the Bernoulli's  $B_{s,m}$  (see Line 6 of Algorithm 1). We refer to the (unique) base  
 257 algorithm playing at round  $t$  as the *active base algorithm*.

258 **Global Variables.** The *active arm set*  $\mathcal{A}_t$  is pruned by the active base algorithm at round  $t$ , and  
 259 globally shared between all running base algorithms. In addition, all other variables, i.e. the  $\ell$ -  
 260 th episode start time  $t_\ell$ , round count  $t$ , schedule  $\{B_{s,m}\}_{s,m}$ , and candidate arm  $\hat{a}_t$  (and thus the

quantities  $\delta_t(\hat{a}_t, a)$  are shared between base algorithms. Thus, while active, each Base-Alg can switch the candidate arm (4) and evict arms (3) over all intervals  $[s_1, s_2]$  elapsed since it began.

Note that only one base algorithm (the active one) can edit  $\mathcal{A}_t$  and set the candidate arm  $\hat{a}_t$  at round  $t$ , while other base algorithms can access these global variables at later rounds. By sharing these global variables, any replay can trigger a new episode: every time an arm is evicted by a replay, it is also evicted from the *master arm set*  $\mathcal{A}_{\text{master}}$ , tracking arms' regret throughout the entire episode. A new episode is triggered when  $\mathcal{A}_{\text{master}}$  becomes empty, i.e., there is no *safe* arm left to play.

## 6 Regret Analysis

### 6.1 Regret of METASWIFT over Significant Phases

Now, we turn to sketching the proof of Theorem 4. Full details are found in Appendix B.

**Decomposing the Regret.** Let  $a_t^\#$  denote the *last safe arm* at round  $t$ , or the last arm to incur significant regret in the unique phase  $[\tau_i, \tau_{i+1})$  containing round  $t$ . Then, we can decompose the dynamic regret around this safe arm using SST and STI (i.e., using Lemma 8 twice) as:

$$\sum_{t=1}^T \delta_t(a_t^*, \hat{a}_t) + \delta_t(a_t^*, a_t) \leq 6 \sum_{t=1}^T \delta_t(a_t^*, a_t^\#) + 3 \sum_{t=1}^T \delta_t(a_t^\#, \hat{a}_t) + \sum_{t=1}^T \delta_t(\hat{a}_t, a_t),$$

where we recall that  $a_t \in \mathcal{A}_t$  is the other arm played (Line 3 of Algorithm 2). Next, the first sum on the above RHS is order  $\sum_{i=1}^{\tilde{L}} \sqrt{K \cdot (\tau_i - \tau_{i-1})}$  as the last safe arm  $a_t^\#$  does not incur significant regret on  $[\tau_i, \tau_{i+1})$ . So, it remains to bound the last two sums on the RHS above.

**Episodes Align with Significant Phases.** We claim that a new episode is triggered only if there is a significant shift occurs (Lemma 11). This follows from our eviction criteria (3) with Freedman's inequality for martingale concentration (Lemma 9). Then, acknowledging episodes roughly align with significant phases, we turn our attention to bounding the remaining regret in each episode.

**Bounding Regret of an Episode.** Let  $t_\ell$  be the start of the  $\ell$ -th episode of METASWIFT. Then, our goal is to show for all  $\ell \in [\hat{L}]$  (where  $\hat{L}$  is the random number of episodes used by the algorithm):

$$\max \left\{ \mathbb{E} \left[ \sum_{t=t_\ell}^{t_{\ell+1}-1} \delta_t(a_t^\#, \hat{a}_t) \right], \mathbb{E} \left[ \sum_{t=t_\ell}^{t_{\ell+1}-1} \delta_t(\hat{a}_t, a_t) \right] \right\} \lesssim \sum_{i \in [\tilde{L}+1]: [\tau_{i-1}, \tau_i) \cap [t_\ell, t_{\ell+1}) \neq \emptyset} \sqrt{K \cdot (\tau_i - \tau_{i-1})}, \quad (5)$$

where the RHS sum above is over the significant phases  $[\tau_{i-1}, \tau_i)$  overlapping episode  $[t_\ell, t_{\ell+1})$ . Summing over episodes  $\ell \in [\hat{L}]$  will then yield the desired total regret bound by our earlier observation that the episodes align with significant phases (see Lemma 11).

**Bounding Regret of Active Arms to Candidate Arms.** Bounding  $\sum_{t=t_\ell}^{t_{\ell+1}-1} \delta_t(\hat{a}_t, a_t)$  follows in a similar manner as Appendix B.1 of [30]. First, observe by concentration (Lemma 9) the eviction criterion (3) bounds the sums  $\sum_{t=s_1}^{s_2} \delta_t(\hat{a}_t, a)$  over intervals  $[s_1, s_2]$  where  $a$  is active. Then, accordingly, we further partition the episode rounds  $[t_\ell, t_{\ell+1})$  into different intervals distinguishing the unique regret contributions of different active arms from varying base algorithms, on each of which we can relate the regret to our eviction criterion. Details can be found in Appendix B.3.

• **Bounding Regret of Candidate Arm to Safe Arm.** The first sum on the LHS of (5) will be further decomposed using the *last master arm*  $a_\ell$  which is the last arm to be evicted from the master arm set  $\mathcal{A}_{\text{master}}$  in episode  $[t_\ell, t_{\ell+1})$ . Carefully using SST and STI (see Lemma 13), we further decompose  $\delta_t(a_t^\#, \hat{a}_t)$  as:

$$\sum_{t=t_\ell}^{t_{\ell+1}-1} \delta_t(a_t^\#, \hat{a}_t) \leq 2 \underbrace{\sum_{t=t_\ell}^{t_{\ell+1}-1} \delta_t(a_t^\#, a_\ell)}_A + \underbrace{\sum_{t=t_\ell}^{t_{\ell+1}-1} \delta_t(a_\ell, \hat{a}_t)}_B + 3 \underbrace{\sum_{t=t_\ell}^{t_{\ell+1}-1} \delta_t(a_t^*, a_t^\#)}_C \quad (6)$$

The sum C above was already bounded earlier. So, we turn our attention to B and A.

297 • **Bounding B.** Note that the arm  $a_\ell$  by definition is never evicted by any base algorithm until the  
 298 end of the episode  $t_{\ell+1} - 1$ . This means that at round  $t \in [t_\ell, t_{\ell+1})$ , the quantity  $\sum_{s=t_\ell}^t \hat{\delta}_s(a_\ell, \hat{a}_s)$  is  
 299 always kept small by the candidate arm switching criterion (4). So, by concentration (Proposition 10),  
 300 we have  $\sum_{s=t_\ell}^{t_{\ell+1}-1} \hat{\delta}_s(a_\ell, \hat{a}_s) \lesssim \sqrt{K(t_{\ell+1} - t_\ell)}$ .

301 • **Bounding A** The main intuition here, similar to Appendix B.2 of Suk and Kpotufe [30], is that  
 302 well-timed replays are scheduled w.h.p. to ensure fast detection of large regret of the last master  
 303 arm  $a_\ell$ . Key in this is the notion of a *bad segment of time*: i.e., an interval  $[s_1, s_2] \subseteq [\tau_i, \tau_{i+1})$  lying  
 304 inside a significant phase with last safe arm  $a^\#$  where:

$$\sum_{t=s_1}^{s_2} \delta_t(a^\#, a_\ell) \gtrsim \sqrt{K \cdot (s_2 - s_1)}. \quad (7)$$

305 For a fixed bad segment  $[s_1, s_2]$ , the idea is that a fortuitously timed replay scheduled at round  $s_1$   
 306 and remaining active till round  $s_2$  will evict arm  $a_\ell$ .

307 It is not immediately obvious how to carry out this argument in the dueling bandit problem since, to  
 308 detect large  $\sum_t \delta_t(a^\#, a_\ell)$ , the pair of arms  $a^\#, a_\ell$  need to both be played which, as we discussed in  
 309 Section 5.1, may not occur often enough to ensure tight estimation of the gaps.

310 Instead, we carefully make use of SST/STI to relate  $\delta_t(a^\#, a_\ell)$  to  $\delta_t(\hat{a}_t, a_\ell)$ . Note this latter quantity  
 311 controls both the eviction (3) and  $\hat{a}_t$  switching (4) criteria. This allows us to convert bad intervals  
 312 with large  $\sum_t \delta_t(a^\#, a_\ell)$  to intervals with large  $\sum_t \delta_t(\hat{a}_t, a_\ell)$ . Specifically, by Lemma 13, we have  
 313 that (7) implies

$$2 \sum_{t=s_1}^{s_2} \delta_t(a^\#, \hat{a}_t) + \sum_{t=s_1}^{s_2} \delta_t(\hat{a}_t, a_\ell) + 3 \sum_{t=s_1}^{s_2} \delta_t(a_t^*, a^\#) \gtrsim \sqrt{K \cdot (s_2 - s_1)}. \quad (8)$$

314 Then, we claim that, so long as a base algorithm  $\text{Base-Alg}(s_1, m)$  is scheduled from  $s_1$  running till  $s_2$ ,  
 315 we will have  $\sum_{t=s_1}^{s_2} \delta_t(\hat{a}_t, a_\ell) \gtrsim \sqrt{K \cdot (s_2 - s_1)}$  which implies  $a_\ell$  will be evicted. In other words,  
 316 the second sum dominates the first and third sums in (8). We repeat earlier arguments to show this:

- 317 • By the definition of the last safe arm  $a^\#$ ,  $\sum_{t=s_1}^{s_2} \delta_t(a_t^*, a^\#) < \sqrt{K \cdot (s_2 - s_1)}$ .
- 318 • Meanwhile,  $\sum_{t=s_1}^{s_2} \delta_t(a^\#, \hat{a}_t) \lesssim \sqrt{K \cdot (s_2 - s_1)}$  by the candidate switching criterion (4) and  
 319 because  $a^\#$  will not be evicted before round  $s_2$  lest it incurs significant regret which cannot happen  
 320 by definition of  $a^\#$ .

321 Combining the above two points with (8), we have that  $\sum_{t=s_1}^{s_2} \delta_t(\hat{a}_t, a_\ell) \gtrsim \sqrt{K \cdot (s_2 - s_1)}$ , which  
 322 directly aligns with our criterion (3) for evicting  $a_\ell$ . To summarize, a bad segment  $[s_1, s_2]$  in the  
 323 sense of (7) is detectable using a well-timed instance of SWIFT, which happens often enough with  
 324 high probability. Concretely, we argue that not too many bad segments elapse before  $a_\ell$  is evicted by  
 325 a well-timed replay in the above sense and that thus the regret incurred by  $a_\ell$  is bounded by the RHS  
 326 of (5). The details can be found in Appendix B.5.

## 327 7 Conclusion

328 We consider the problem of switching dueling bandits where the distribution over preferences can  
 329 change over time. We study a notion of significant shifts in preferences and ask whether one can  
 330 achieve adaptive dynamic regret of  $O(\sqrt{K\tilde{L}T})$  where  $\tilde{L}$  is the number of significant shifts. We  
 331 give a negative result showing that one cannot achieve such a result outside of the SST $\cap$ STI setting,  
 332 and answer this question in the affirmative under the SST $\cap$ STI setting. In the future, it would be  
 333 interesting to consider other notions of shifts which are weaker than the notion of significant shift,  
 334 and ask whether adaptive algorithms for the Condorcet setting can be designed with respect to these  
 335 notions. [10] already give a  $O(K\sqrt{ST})$  bound for the Condorcet setting, where  $S$  is the number of  
 336 changes in ‘best’ arm. However, their results have a suboptimal dependence on  $K$  due to reduction to  
 337 “all-pairs” exploration.

## References

- [1] Y. Abbasi-Yadkori, A. Gyorgy, and N. Lazic. A new look at dynamic regret for non-stationary stochastic bandits. *arXiv preprint arXiv:2201.06532*, 2022.
- [2] A. Agarwal, R. Ghuge, and V. Nagarajan. Batched dueling bandits. In *Proceedings of the 39th International Conference on Machine Learning*, pages 89–110, 2022.
- [3] N. Ailon, Z. Karnin, and T. Joachims. Reducing Dueling Bandits to Cardinal Bandits. In *Proceedings of the 31st International Conference on Machine Learning*, 2014.
- [4] R. Allesiardo, R. Féraud, and O.-A. Maillard. The non-stationary stochastic multi-armed bandit problem. *International Journal of Data Science and Analytics*, 3(4):267–283, 2017.
- [5] P. Auer, N. Cesa-Bianchi, Y. Freund, and R. E. Schapire. The Nonstochastic Multiarmed Bandit Problem. *SIAM Journal on Computing*, 32(1):48–77, 2002.
- [6] P. Auer, P. Gajane, and R. Ortner. Adaptively tracking the best arm with an unknown number of distribution changes. *14th European Workshop on Reinforcement Learning (EWRL)*, 2018.
- [7] P. Auer, P. Gajane, and R. Ortner. Adaptively tracking the best bandit arm with an unknown number of distribution changes. In A. Beygelzimer and D. Hsu, editors, *Conference on Learning Theory, COLT 2019, 25-28 June 2019, Phoenix, AZ, USA*, volume 99 of *Proceedings of Machine Learning Research*, pages 138–158. PMLR, 2019.
- [8] O. Besbes, Y. Gur, and A. Zeevi. Stochastic multi-armed-bandit problem with non-stationary rewards. *Advances in Neural Information Processing Systems*, 27:199–207, 2014.
- [9] A. Beygelzimer, J. Langford, L. Li, L. Reyzin, and R. Schapire. Contextual bandit algorithms with supervised learning guarantees. In *Proceedings of the 14th International Conference on Artificial Intelligence and Statistics*, pages 19–26, 2011.
- [10] T. K. Buening and A. Saha. Anaconda: An improved dynamic regret algorithm for adaptive non-stationary dueling bandits. *arXiv preprint arXiv:2210.14322*, 2022.
- [11] B. Chen and P. I. Frazier. Dueling Bandits with Weak Regret. In *Proceedings of the 34th International Conference on Machine Learning*, 2017.
- [12] Y. Chen, C.-W. Lee, H. Luo, and C.-Y. Wei. A new algorithm for non-stationary contextual bandits: Efficient, optimal, and parameter-free. In *Proceedings of the 32nd Conference on Learning Theory*, 99:1–30, 2019.
- [13] M. Dudik, K. Hofmann, R. E. Schapire, A. Slivkins, and M. Zoghi. Contextual Dueling Bandits. In *Proceedings of the 28th Conference on Learning Theory*, 2015.
- [14] E. Even-Dar, S. Mannor, and Y. Mansour. Action Elimination and Stopping Conditions for the Multi-Armed Bandit and Reinforcement Learning Problems. *Journal of Machine Learning Research*, 7:1079–1105, 2006.
- [15] P. Gajane, T. Urvoy, and F. Clérot. A relative exponential weighing algorithm for adversarial utility-based dueling bandits. In F. R. Bach and D. M. Blei, editors, *Proceedings of the 32nd International Conference on Machine Learning, ICML 2015, Lille, France, 6-11 July 2015*, volume 37 of *JMLR Workshop and Conference Proceedings*, pages 218–227. JMLR.org, 2015.
- [16] A. Garivier and E. Moulines. On upper-confidence bound policies for switching bandit problems. In *International Conference on Algorithmic Learning Theory*, pages 174–188. Springer, 2011.
- [17] S. Gupta and A. Saha. Optimal and efficient dynamic regret algorithms for non-stationary dueling bandits. In *International Conference on Machine Learning*, pages 19027–19049. PMLR, 2022.
- [18] K. Jamieson, S. Katariya, A. Deshpande, and R. Nowak. Sparse Dueling Bandits. In *Proceedings of the 18th International Conference on Artificial Intelligence and Statistics*, 2015.
- [19] L. Kocsis and C. Szepesvári. Discounted ucb. *2nd PASCAL Challenges Workshop*, 2006.

- [20] P. Kolpaczki, V. Bengs, and E. Hüllermeier. Non-stationary dueling bandits. *arXiv preprint arXiv:2202.00935*, 2022.
- [21] J. Komiyama, J. Honda, H. Kashima, and H. Nakagawa. Regret Lower Bound and Optimal Algorithm in Dueling Bandit Problem. In *Proceedings of the 28th Conference on Learning Theory*, 2015.
- [22] J. Komiyama, J. Honda, and H. Nakagawa. Copeland Dueling Bandit Problem: Regret Lower Bound, Optimal Algorithm, and Computationally Efficient Algorithm. In *Proceedings of the 33rd International Conference on Machine Learning*, 2016.
- [23] T.-Y. Liu. Learning to rank for information retrieval. *Found. Trends Inf. Retr.*, 3(3):225–331, mar 2009. ISSN 1554-0669. doi: 10.1561/15000000016.
- [24] F. Radlinski, M. Kurup, and T. Joachims. How does clickthrough data reflect retrieval quality? In *Proceedings of the 17th ACM Conference on Information and Knowledge Management, CIKM '08*, page 43–52, New York, NY, USA, 2008. Association for Computing Machinery. ISBN 9781595939913. doi: 10.1145/1458082.1458092.
- [25] S. Ramamohan, A. Rajkumar, and S. Agarwal. Dueling Bandits : Beyond Condorcet Winners to General Tournament Solutions. In *Advances in Neural Information Processing Systems 29*, 2016.
- [26] A. Saha and P. Gaillard. Versatile dueling bandits: Best-of-both world analyses for learning from relative preferences. In *International Conference on Machine Learning*, pages 19011–19026. PMLR, 2022.
- [27] A. Saha and S. Gupta. Optimal and efficient dynamic regret algorithms for non-stationary dueling bandits. In K. Chaudhuri, S. Jegelka, L. Song, C. Szepesvári, G. Niu, and S. Sabato, editors, *International Conference on Machine Learning, ICML 2022, 17-23 July 2022, Baltimore, Maryland, USA*, volume 162 of *Proceedings of Machine Learning Research*, pages 19027–19049. PMLR, 2022.
- [28] A. Saha, T. Koren, and Y. Mansour. Adversarial dueling bandits. In M. Meila and T. Zhang, editors, *Proceedings of the 38th International Conference on Machine Learning, ICML 2021, 18-24 July 2021, Virtual Event*, volume 139 of *Proceedings of Machine Learning Research*, pages 9235–9244. PMLR, 2021.
- [29] Y. Sui, M. Zoghi, K. Hofmann, and Y. Yue. Advancements in dueling bandits. In J. Lang, editor, *Proceedings of the Twenty-Seventh International Joint Conference on Artificial Intelligence, IJCAI 2018, July 13-19, 2018, Stockholm, Sweden*, pages 5502–5510. ijcai.org, 2018.
- [30] J. Suk and S. Kpotufe. Tracking most significant arm switches in bandits. In *Conference on Learning Theory*, pages 2160–2182. PMLR, 2022.
- [31] T. Urvoy, F. Clerot, R. Feraud, and S. Naamane. Generic Exploration and K-armed Voting Bandits. In *Proceedings of the 30th International Conference on Machine Learning*, 2013.
- [32] C.-Y. Wei and H. Luo. Non-stationary reinforcement learning without prior knowledge: An optimal black-box approach. In *Proceedings of the 32nd International Conference on Learning Theory*, 2021.
- [33] H. Wu and X. Liu. Double thompson sampling for dueling bandits. In *Advances in Neural Information Processing Systems 29: Annual Conference on Neural Information Processing Systems 2016, December 5-10, 2016, Barcelona, Spain*, pages 649–657, 2016.
- [34] Y. Yue and T. Joachims. Beat the mean bandit. In *Proceedings of the 28th International Conference on Machine Learning*, 2011.
- [35] Y. Yue, J. Broder, R. Kleinberg, and T. Joachims. The  $k$ -armed dueling bandits problem. *Journal of Computer and System Sciences*, 78(5):1538–1556, 2012.
- [36] Y. Yue, J. Broder, R. Kleinberg, and T. Joachims. The  $k$ -armed dueling bandits problem. *Journal of Computer and System Sciences*, 78(5):1538–1556, 2012. ISSN 0022-0000. doi: <https://doi.org/10.1016/j.jcss.2011.12.028>. JCSS Special Issue: Cloud Computing 2011.

- 433 [37] M. Zoghi, S. Whiteson, R. Munos, and M. de Rijke. Relative Upper Confidence Bound for the  
434 K-Armed Dueling Bandit Problem. In *Proceedings of the 31st International Conference on*  
435 *Machine Learning*, 2014.
- 436 [38] M. Zoghi, Z. Karnin, S. Whiteson, and M. de Rijke. Copeland Dueling Bandits. In *Advances in*  
437 *Neural Information Processing Systems 28*, 2015.
- 438 [39] M. Zoghi, S. Whiteson, and M. de Rijke. MergeRUCB: A method for large-scale online ranker  
439 evaluation. In *Proceedings of the 8th ACM International Conference on Web Search and Data*  
440 *Mining*, 2015.

### 441 A Proof of Theorem 3

442 Consider the following preference matrices for some  $\epsilon > 0$  (to be chosen later):

$$\mathbf{P}^+ := \begin{pmatrix} 1/2 & 1/2 + \epsilon & 1 \\ 1/2 - \epsilon & 1/2 & 1/2 + \epsilon \\ 0 & 1/2 - \epsilon & 1/2 \end{pmatrix}, \mathbf{P}^- := \begin{pmatrix} 1/2 & 1/2 - \epsilon & 0 \\ 1/2 + \epsilon & 1/2 & 1/2 - \epsilon \\ 1 & 1/2 + \epsilon & 1/2 \end{pmatrix}.$$

443 In environment  $\mathbf{P}^+$ , arm 1 is the Condorcet winner and we have  $1 \succ 2 \succ 3$ . In environment  $\mathbf{P}^-$ , arm  
444 3 is the winner with  $3 \succ 2 \succ 1$ .

445 Consider a uniform mixture  $\mathcal{U}$  of the preference matrices  $\mathbf{P}^+$  and  $\mathbf{P}^-$ . Let  $\mathcal{E}$  be a (random) sequence  
446 of  $T$  environments sampled i.i.d. from  $\mathcal{U}$ , with  $\mathbf{P}_t := (\mathcal{E})_t$  being the sampled environment at round  $t$ .

447 First, it is straightforward to verify in every such switching dueling bandit  $\mathcal{E}$ , arm 2 does not incur  
448 significant regret over any interval of rounds  $[s_1, s_2] \subseteq [1, T]$ , for  $\epsilon < 1/\sqrt{T}$ . Thus, every such  $\mathcal{E}$   
449 exhibits zero significant shifts.

450 Next, in what follows, we use  $\mathbb{E}_{\mathcal{E}}[\cdot]$  to denote an expectation over both the randomness of  $\mathcal{U}^{\otimes T}$  and  
451 the algorithm's feedback and decisions. If there exists a realization of  $\mathcal{E}$  such that the algorithm  
452 gets expected regret at least  $T/8$ , then we are already done. Otherwise, we have the expected  
453 regret over the random environment  $\mathcal{E}$  is bounded above by  $T/8$ . Next, define the *arm-pull counts*  
454  $N(T, a) := \sum_{t=1}^T \mathbf{1}\{i_t = a\} + \mathbf{1}\{j_t = a\}$  for each arm  $a$ . Then, we relate these arm-pull counts to  
455 the regret:

$$\begin{aligned} T/8 &> \sum_{t=1}^T \mathbb{E}_{\mathcal{E}} [\delta_t(i^*, i_t) + \delta_t(i^*, j_t)] \\ &\geq \frac{1}{2} \sum_{t=1}^T \mathbb{E}_{\mathcal{E}} [(\mathbf{1}\{i_t = 3\} + \mathbf{1}\{j_t = 3\}) \cdot \mathbf{1}\{(\mathcal{E})_t = \mathbf{P}^+\} + (\mathbf{1}\{i_t = 1\} + \mathbf{1}\{j_t = 1\}) \cdot \mathbf{1}\{(\mathcal{E})_t = \mathbf{P}^-\}] \\ &= \frac{1}{2} \sum_{t=1}^T \mathbb{E}_{\mathcal{E}} \left[ \frac{1}{2} \cdot (\mathbf{1}\{i_t = 3\} + \mathbf{1}\{j_t = 3\} + \mathbf{1}\{i_t = 1\} + \mathbf{1}\{j_t = 1\}) \right] \\ &\geq \frac{1}{4} \cdot \mathbb{E}_{\mathcal{E}} [N(T, 3) + N(T, 1)], \end{aligned}$$

456 where we use the tower law in the third inequality (note that  $i_t, j_t$  are independent of  $(\mathcal{E})_t$ ). Thus, in  
457 expectation over both the model noise and randomness of  $\mathcal{E}$ , arms 3 and 1 cannot be played more  
458 than  $T/2$  times without causing linear regret.

459 Since  $\sum_{a=1}^3 \mathbb{E}_{\mathcal{E}} [N(T, a)] = 2T$ , we conclude that  $\mathbb{E}_{\mathcal{E}} [N(T, 2)] \geq 3T/2$ . We will next show that  
460 arm 2 is statistically indistinguishable from arm 3. To do so, we consider an analogous environment  
461 which is identical to  $\mathcal{E}$  except the identities of arms 2 and 3 are switched. Specifically, let  $\mathcal{E}'$  be a  
462 random sequence of  $T$  environments sampled i.i.d. from a uniform mixture of  $\mathbf{Q}^+$  and  $\mathbf{Q}^-$ , which  
463 are respectively  $\mathbf{P}^+$  and  $\mathbf{P}^-$  with switched entries for arms 2 and 3.

464 We next claim  $\mathbb{E}_{\mathcal{E}} [N(T, 2)] = \mathbb{E}_{\mathcal{E}'} [N(T, 2)]$ . Admitting this claim, it immediately follows that the  
465 algorithm has expected regret (over the randomness of  $\mathcal{E}'$ ) at least (using an analogous chain of  
466 inequalities as above):

$$\mathbb{E}_{\mathcal{E}'} [\text{DR}(T)] \geq \frac{1}{4} \cdot \mathbb{E}_{\mathcal{E}'} [N(T, 2)] \geq 3T/8.$$

467 In particular, there exists a realization of  $\mathcal{E}'$  within the prior on environments on which the regret is at  
468 least  $3T/8$ .

469 It remains to show  $\mathbb{E}_{\mathcal{E}} [N(T, 2)] = \mathbb{E}_{\mathcal{E}'} [N(T, 2)]$ . This will follow from Pinsker's inequality and  
470 showing that the KL between  $\mathcal{E}$  and  $\mathcal{E}'$  is zero.

471 We first observe that the dueling observations  $O_t(i, j)$  at each round  $t \in [T]$  are identically a  $\text{Ber}(1/2)$   
472 R.V. for all pairs of arms  $i, j$  in both  $\mathcal{E}$  and  $\mathcal{E}'$ , since a uniform mixture of a  $\text{Ber}(1/2 + \epsilon)$  and a  
473  $\text{Ber}(1/2 - \epsilon)$  is a  $\text{Ber}(1/2)$ , while so is the uniform mixture of a  $\text{Ber}(1)$  and a  $\text{Ber}(0)$ .

474 Then, since  $N(T, 2) \leq 2T$ , by Pinsker's inequality [see 17, proof of Lemma C.1], we have:

$$\mathbb{E}_{\mathcal{E}} [N(T, 2)] - \mathbb{E}_{\mathcal{E}'} [N(T, 2)] \leq 2T \sqrt{\frac{\text{KL}(\mathcal{P}, \mathcal{P}')}{2}},$$

where  $\mathcal{P}$  and  $\mathcal{P}'$  are the induced distributions over the randomness  $\mathcal{U}^{\otimes T}$ , and the history of observations and decisions in  $T$  rounds by  $\mathcal{E}$  and  $\mathcal{E}'$ . Let  $\mathcal{H}_t$  be the history of randomness, observations, and decisions till round  $t$ :  $\mathcal{H}_t = \{(u_s, i_s, j_s, O_s(i_s, j_s))\}_{s \leq t}$  where  $u_s \sim \text{Ber}(1/2)$  decides whether  $\mathbf{P}^+/\mathbf{Q}^+$  or  $\mathbf{P}^-/\mathbf{Q}^-$  is realized at round  $t$ . Let  $\mathcal{P}_t$  and  $\mathcal{P}'_t$  denote the respective marginal distributions over the round  $t$  data  $(u_t, i_t, j_t, O_t(i_t, j_t))$ . Then, repeatedly using chain rule for KL and then conditioning on the played arms  $(i_t, j_t)$  (whose identities are fixed given  $\mathcal{H}_{t-1}$ ) at round  $t$ , we get:

$$\text{KL}(\mathcal{P}, \mathcal{P}') = \sum_{t=1}^T \text{KL}(\mathcal{P}_t | \mathcal{H}_{t-1}, \mathcal{P}'_t | \mathcal{H}_{t-1}) = \sum_{t=1}^T \mathbb{E}_{\mathcal{H}_{t-1}} [\mathbb{E}_{i_t, j_t} [\text{KL}(\text{Ber}(1/2), \text{Ber}(1/2))]] = 0.$$

481

**Remark 2.** The constructed environments  $\mathbf{P}^+, \mathbf{P}^-$  in the proof of Theorem 3 satisfies SST but violates STI. A similar construction which violates SST (but satisfies STI) can also be used in the proof. Let

$$\mathbf{P}^+ := \begin{pmatrix} 1/2 & 1/2 - \epsilon & 1/2 - \epsilon \\ 1/2 + \epsilon & 1/2 & 0 \\ 1/2 + \epsilon & 1 & 1/2 \end{pmatrix},$$

and let  $\mathbf{P}^-$  be the same preference matrix with arms 2 and 3 switched. Note that  $3 \succ 2 \succ 1$  in  $\mathbf{P}^+$  and  $2 \succ 3 \succ 1$  in  $\mathbf{P}^-$ . Here, arm 1 is the “safe” arm as it always has a gap of  $\epsilon$  while arms 2 and 3 randomly alternate between being the best arm and the worst arm with a gap of  $1/2$ . Thus, both the STI and SST assumptions are required to get sublinear regret in mildly adversarial environments.

Due to these observation we have the following corollaries.

**Corollary 6.** For each horizon  $T$ , there exists a finite family  $\mathcal{F}$  of switching dueling bandit environments with  $K = 3$  that satisfies the SST condition with  $\tilde{L} = 0$  significant shifts. The worst-case regret of any algorithm on an environment  $\mathcal{E}$  in this family is lower bounded as

$$\sup_{\mathcal{E} \in \mathcal{F}} \mathbb{E}_{\mathcal{E}} [\text{DR}(T)] \geq T/8.$$

**Corollary 7.** For each horizon  $T$ , there exists a finite family  $\mathcal{F}$  of switching dueling bandit environments with  $K = 3$  that satisfies the STI condition with  $\tilde{L} = 0$  significant shifts. The worst-case regret of any algorithm on an environment  $\mathcal{E}$  in this family is lower bounded as

$$\sup_{\mathcal{E} \in \mathcal{F}} \mathbb{E}_{\mathcal{E}} [\text{DR}(T)] \geq T/8.$$

## B Full Proof of Theorem 4

Throughout the proof  $c_1, c_2, \dots$  will denote positive constants not depending on  $T$  or any distributional parameters. First, we observe the regret bound is vacuous for  $T < K$ ; so, assume  $T \geq K$ . Recall from Line 3 of Algorithm 1 that  $t_\ell$  is the first round of the  $\ell$ -th episode. WLOG, there are  $T$  total episodes and, by convention, we let  $t_\ell := T + 1$  if only  $\ell - 1$  episodes occurred by round  $T$ .

Next, we establish an elementary lemma which will help us leverage the STI and SST assumptions.

### B.1 Decomposing the Regret

**Lemma 8.** For any three arms  $b, c$ , under  $\text{SST} \cap \text{STI}$ :  $\delta_t(a_t^*, c) \leq 2 \cdot \delta_t(a_t^*, b) + \delta_t(b, c)$ .

*Proof.* If  $b \succeq_t c$ , this is true by STI. Otherwise,  $\delta_t(a_t^*, c) \leq \delta_t(a_t^*, b) \leq \delta_t(a_t^*, b) + \delta_t(a_t^*, b) - \delta_t(c, b)$  by SST.  $\square$

Using Lemma 8 twice, we have the regret can be written as

$$\sum_{t=1}^T \delta_t(a_t^*, \hat{a}_t) + \delta_t(a_t^*, a_t) \leq \sum_{t=1}^T 6 \cdot \delta_t(a_t^*, a_t^\#) + 3 \cdot \delta_t(a_t^\#, \hat{a}_t) + \delta_t(\hat{a}_t, a_t).$$

Following the discussion of Section 4, it remains to bound  $\sum_{t=1}^T \delta_t(a_t^\#, \hat{a}_t)$  and  $\sum_{t=1}^T \delta_t(\hat{a}_t, a_t)$  in expectation. For this, we need to relate our estimators  $\hat{\delta}_t(\hat{a}_t, a)$  to the true gaps  $\delta_t(\hat{a}_t, a)$ .

## 508 B.2 Relating Estimated Gaps to Regret

509 We first recall a version of Freedman's martingale concentration inequality, identical to the one used  
510 in Suk and Kpotufe [30], Buening and Saha [10].

511 **Lemma 9** (Theorem 1 of Beygelzimer et al. [9]). *Let  $X_1, \dots, X_n \in \mathbb{R}$  be a martingale difference  
512 sequence with respect to some filtration  $\{\mathcal{F}_0, \mathcal{F}_1, \dots\}$ . Assume for all  $t$  that  $X_t \leq R$  a.s. and that  
513  $\sum_{i=1}^n \mathbb{E}[X_i^2 | \mathcal{F}_{i-1}] \leq V_n$  a.s. for some constant  $V_n$  only depending on  $n$ . Then for any  $\delta \in (0, 1)$ ,  
514 with probability at least  $1 - \delta$ , we have:*

$$\sum_{i=1}^n X_i \leq (e - 1) \left( \sqrt{V_n \log(1/\delta)} + R \log(1/\delta) \right).$$

515 We next apply Lemma 9 to bound the estimation error of our estimates  $\hat{\delta}_t(\hat{a}_t, a)$ , found in (2).

516 **Proposition 10.** *Let  $\mathcal{E}_1$  be the event that for all rounds  $s_1 < s_2$  and all arms  $a \in [K]$ :*

$$\left| \sum_{t=s_1}^{s_2} \hat{\delta}_t(\hat{a}_t, a) - \sum_{t=s_1}^{s_2} \mathbb{E}[\hat{\delta}_t(\hat{a}_t, a) | \mathcal{F}_{t-1}] \right| \leq c_1 \log(T) \left( \sqrt{K(s_2 - s_1)} + K \right), \quad (9)$$

517 *for an appropriately large constant  $c_1$ , and where  $\mathcal{F} := \{\mathcal{F}_t\}_{t=1}^T$  is the canonical filtration generated  
518 by observations and randomness of elapsed rounds. Then,  $\mathcal{E}_1$  occurs with probability at least  
519  $1 - 1/T^2$ .*

520 *Proof.* The random variable  $\hat{\delta}_t(\hat{a}_t, a) - \mathbb{E}[\hat{\delta}_t(\hat{a}_t, a) | \mathcal{F}_{t-1}]$  is a martingale difference bounded above  
521 by  $K$  for all rounds  $t$  and all arms  $a, a'$ . Note here that the identity of the candidate arm  $\hat{a}_t$  is fixed  
522 conditional on the observations of the previous rounds  $\mathcal{F}_{t-1}$ . The variance of this difference is:

$$\begin{aligned} \sum_{t=s_1}^{s_2} \mathbb{E}[\hat{\delta}_t^2(\hat{a}_t, a) | \mathcal{F}_{t-1}] &\leq \sum_{t=s_1}^{s_2} 2|\mathcal{A}_t|^2 \mathbb{E}[\mathbf{1}\{j_t = a\} | \mathcal{F}_{t-1}] \\ &\leq \sum_{t=s_1}^{s_2} 2|\mathcal{A}_t|^2 \cdot \frac{1}{|\mathcal{A}_t|} \\ &\leq 2K \cdot (s_2 - s_1 + 1). \\ &\leq 4K \cdot (s_2 - s_1) \end{aligned}$$

523 Then, the result follows from Lemma 9 and taking union bounds over arms  $a$  and rounds  $s_1, s_2$ .  $\square$

524 Since the contribution to the expected regret is small outside of the high-probability good event  $\mathcal{E}_1$ ,  
525 going forward we will assume as necessary that (9) holds for all arms  $a \in [K]$  and rounds  $s_1, s_2$ .  
526 The next result asserts that episodes roughly correspond to significant shifts in the sense that a restart  
527 (Line 8 of Algorithm 1) occurs only if a significant shift has been detected.

528 **Lemma 11.** *On event  $\mathcal{E}_1$ , for each episode  $[t_\ell, t_{\ell+1})$  with  $t_{\ell+1} \leq T$  (i.e., an episode which concludes  
529 with a restart), there exists a significant shift  $\tau_i \in [t_\ell, t_{\ell+1})$ .*

530 *Proof.* We have that

$$\mathbb{E}[\hat{\delta}_t(\hat{a}_t, a) | \mathcal{F}_{t-1}] = \begin{cases} \delta_t(\hat{a}_t, a) & a \in \mathcal{A}_t \\ -1/2 & a \notin \mathcal{A}_t \end{cases}.$$

531 Thus, by concentration (Proposition 10) and the eviction criteria (3) with large enough constant  $C > 0$ ,  
532 we have that an arm  $a$  being evicted over interval  $[s_1, s_2]$  implies  $\sum_{t=s_1}^{s_2} \delta_t(\hat{a}_t, a) > \sqrt{K \cdot (s_2 - s_1)}$ .  
533 By the SST condition, this means that

$$\sum_{t=s_1}^{s_2} \delta_t(a_t^*, a) \geq \sum_{t=s_1}^{s_2} \delta_t(\hat{a}_t, a) > \sqrt{K \cdot (s_2 - s_1)}.$$

534 This means, over the course of episode  $[t_\ell, t_{\ell+1})$ , every arm  $a \in [K]$  incurs significant regret meaning  
535 a significant shift must take place between rounds  $t_\ell$  and  $t_{\ell+1} - 1$ .  $\square$

536 Following the outline of Section 4, we now turn our attention to bounding the regrets  $\delta_t(a_t^\#, \hat{a}_t)$  and  
537  $\delta_t(\hat{a}_t, a_t)$  over a single episode  $[t_\ell, t_{\ell+1})$ .

### 538 B.3 Bounding $\mathbb{E}[\sum_{t=t_\ell}^{t_{\ell+1}-1} \delta_t(\hat{a}_t, a_t)]$ : Regret of Active Arms to Candidate Arm

539 We first decompose the total sum of regrets  $\mathbb{E}[\sum_{t=1}^T \delta_t(\hat{a}_t, a_t)]$  based on which arm  $a_t$  chooses within  
 540 the active set  $\mathcal{A}_t$ . Using tower law, we have

$$\mathbb{E} \left[ \sum_{t=1}^T \delta_t(\hat{a}_t, a_t) \right] = \sum_{t=1}^T \mathbb{E}[\mathbb{E}[\delta_t(\hat{a}_t, a_t) \mid \mathcal{F}_{t-1}]] = \mathbb{E} \left[ \sum_{t=1}^T \sum_{a \in \mathcal{A}_t} \frac{\delta_t(\hat{a}_t, a)}{|\mathcal{A}_t|} \right].$$

541 Splitting the above RHS back along episodes, we obtain the sum  $\mathbb{E}[\sum_{t=t_\ell}^{t_{\ell+1}-1} \sum_{a \in \mathcal{A}_t} \delta_t(\hat{a}_t, a)/|\mathcal{A}_t|]$ .

542 Next, we condition on the good event  $\mathcal{E}_1$  on which the concentration bounds of Proposition 10 hold.

543 Additionally, we divide up the rounds  $t$  into those before arm  $a$  is evicted from  $\mathcal{A}_{\text{master}}$  and those after.

544 Suppose arm  $a$  is evicted from  $\mathcal{A}_{\text{master}}$  at round  $t_\ell^a \in [t_\ell, t_{\ell+1})$ . In particular, this means arm  $a \in \mathcal{A}_t$   
 545 for all  $t \in [t_\ell, t_\ell^a)$ . Thus, it suffices to bound:

$$\mathbb{E} \left[ \mathbf{1}\{\mathcal{E}_1\} \cdot \left( \sum_{a=1}^K \sum_{t=t_\ell}^{t_\ell^a-1} \frac{\delta_t(\hat{a}_t, a)}{|\mathcal{A}_t|} + \sum_{a=1}^K \sum_{t=t_\ell^a}^{t_{\ell+1}-1} \frac{\delta_t(\hat{a}_t, a)}{|\mathcal{A}_t|} \cdot \mathbf{1}\{a \in \mathcal{A}_t\} \right) \right]. \quad (10)$$

546 Suppose WLOG that  $t_\ell^1 \leq t_\ell^2 \leq \dots \leq t_\ell^K$ . Then, for each round  $t < t_\ell^a$  all arms  $a' \geq a$  are retained  
 547 in  $\mathcal{A}_{\text{master}}$  and thus retained in the candidate arm set  $\mathcal{A}_t$ . Thus,  $|\mathcal{A}_t| \geq K + 1 - a$  for all  $t \leq t_\ell^a$ .

548 Then, the first double sum in (10) can be bounded by combining our eviction criterion (3) with our  
 549 concentration bounds Proposition 10. Since arm  $a$  is not evicted from  $\mathcal{A}_t$  till round  $t_\ell^a$ , on event  $\mathcal{E}_1$   
 550 we have for some  $c_2 > 0$ :

$$\sum_{t=t_\ell}^{t_\ell^a-1} \delta_t(\hat{a}_t, a) = \sum_{t=t_\ell}^{t_\ell^a-1} \mathbb{E}[\delta_t(\hat{a}_t, a) \mid \mathcal{F}_{t-1}] \leq c_2 \log(T) \sqrt{K(t_\ell^a - t_\ell) \vee K^2}$$

551 Then, using the fact that  $|\mathcal{A}_t| \geq K + 1 - a$  for all  $t \in [t_\ell, t_\ell^a)$ , we have:

$$\sum_{t=t_\ell}^{t_\ell^a-1} \frac{\delta_t(\hat{a}_t, a)}{|\mathcal{A}_t|} \leq \frac{c_2 \log(T) \sqrt{K(t_\ell^a - t_\ell) \vee K^2}}{K + 1 - a}.$$

552 Then, summing the above R.H.S. over all arms  $a$ , we have on event  $\mathcal{E}_1$ :

$$\sum_{a=1}^K \sum_{t=t_\ell}^{t_\ell^a-1} \frac{\delta_t(\hat{a}_t, a)}{|\mathcal{A}_t|} \leq c_2 \log(K) \log(T) \sqrt{K(t_{\ell+1} - t_\ell) \vee K^2}.$$

553 Next, we handle the second double sum in (10). We first observe that if arm  $a$  is played after round  
 554  $t_\ell^a$ , then it must due to a scheduled replay. The difficulty here is that replays may interrupt each other  
 555 and so care must be taken in managing the relative regret contribution  $\sum_t \delta_t(\hat{a}_t, a)$  (which may be  
 556 negative if  $a \prec \hat{a}_t$ ) of different overlapping replays.

557 Fixing an arm  $a$ , our strategy is to partition the rounds when  $a$  is played by a replay after round  $t_\ell^a$   
 558 according to which replay is active and not accounted for by another replay. This involves carefully  
 559 designating a subclass of replays whose durations while playing  $a$  span all the rounds where  $a$  is  
 560 played after  $t_\ell^a$ . Then, we cover the times when  $a$  is played by a collection of intervals corresponding  
 561 to the schedules of this subclass of replays, on each of which we can employ the eviction criterion (3)  
 562 and concentration like before.

563 For this purpose, we define the following terminology (which is all w.r.t. a fixed arm  $a$ ):

564 **Definition 4.**

- 565 (i) For each scheduled and activated **Base-Alg**( $s, m$ ), let the round  $M(s, m)$  be the minimum of  
 566 two quantities: (a) the last round in  $[s, s+m]$  when arm  $a$  is retained by **Base-Alg**( $s, m$ ) and  
 567 all of its children, and (b) the last round that **Base-Alg**( $s, m$ ) is active and not permanently  
 568 interrupted. Call the interval  $[s, M(s, m)]$  the **active interval** of **Base-Alg**( $s, m$ ).
- 569 (ii) Call a replay **Base-Alg**( $s, m$ ) **proper** if there is no other scheduled replay **Base-Alg**( $s', m'$ )  
 570 such that  $[s, s+m] \subset (s', s'+m')$  where **Base-Alg**( $s', m'$ ) will become active again after  
 571 round  $s+m$ . In other words, a proper replay is not scheduled inside the scheduled range of  
 572 rounds of another replay. Let  $\text{PROPER}(t_\ell, t_{\ell+1})$  be the set of proper replays scheduled to  
 573 start before round  $t_{\ell+1}$ .

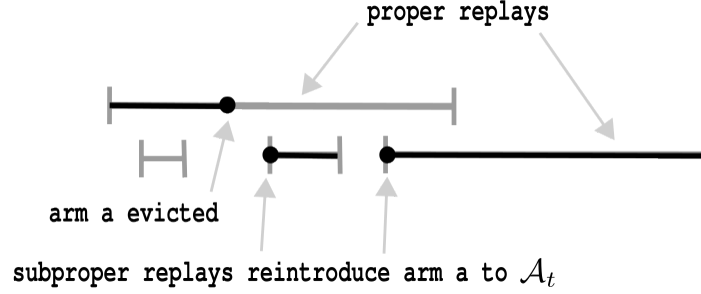

Figure 2: Shown are replay scheduled durations (in gray) with dots marking when arm  $a$  is reintroduced to  $\mathcal{A}_t$ . Black segments indicate the period  $[s, M(s, m)]$  for proper and subproper replays. Note that the rounds where  $a \in \mathcal{A}_t$  in the left unlabeled replay's duration are accounted for by the larger proper replay.

574 (iii) Call a scheduled replay  $\text{Base-Alg}(s, m)$  **subproper** if it is non-proper and if each of its  
 575 ancestor replays (i.e., previously scheduled replays whose durations have not concluded)  
 576  $\text{Base-Alg}(s', m')$  satisfies  $M(s', m') < s$ . In other words, a subproper replay either  
 577 permanently interrupts its parent or does not, but is scheduled after its parent (and all  
 578 its ancestors) stops playing arm  $a$ . Let  $\text{SUBPROPER}(t_\ell, t_{\ell+1})$  be the set of all subproper  
 579 replays scheduled before round  $t_{\ell+1}$ .

580 Equipped with this language, we now show some basic claims which essentially reduce analyzing the  
 581 complicated hierarchy of replays to analyzing the active intervals of replays in  $\text{PROPER}(t_\ell, t_{\ell+1}) \cup$   
 582  $\text{SUBPROPER}(t_\ell, t_{\ell+1})$ .

583 **Proposition 12.** *The active intervals*

$$\{[s, M(s, m)] : \text{Base-Alg}(s, m) \in \text{PROPER}(t_\ell, t_{\ell+1}) \cup \text{SUBPROPER}(t_\ell, t_{\ell+1})\},$$

584 *are mutually disjoint.*

585 *Proof.* Clearly, the classes of replays  $\text{PROPER}(t_\ell, t_{\ell+1})$  and  $\text{SUBPROPER}(t_\ell, t_{\ell+1})$  are disjoint. Next,  
 586 we show the respective active intervals  $[s, M(s, m)]$  and  $[s', M(s', m')]$  of any two  $\text{Base-Alg}(s, m)$   
 587 and  $\text{Base-Alg}(s', m') \in \text{PROPER}(t_\ell, t_{\ell+1}) \cup \text{SUBPROPER}(t_\ell, t_{\ell+1})$  are disjoint.

- 588 1. Proper replay vs. subproper replay: a subproper replay can only be scheduled after the  
 589 round  $M(s, m)$  of the most recent proper replay  $\text{Base-Alg}(s, m)$  (which is necessarily an  
 590 ancestor). Thus, the active intervals of proper replays and subproper replays.
- 591 2. Two distinct proper replays: two such replays can only permanently interrupt each other,  
 592 and since  $M(s, m)$  always occurs before the permanent interruption of  $\text{Base-Alg}(s, m)$ , we  
 593 have the active intervals of two such replays are disjoint.
- 594 3. Two distinct subproper replays: consider two non-proper replays  
 595  $\text{Base-Alg}(s, m), \text{Base-Alg}(s', m') \in \text{SUBPROPER}(t_\ell, t_{\ell+1})$  with  $s' > s$ . The only  
 596 way their active intervals intersect is if  $\text{Base-Alg}(s, m)$  is an ancestor of  $\text{Base-Alg}(s', m')$ .  
 597 Then, if  $\text{Base-Alg}(s', m')$  is subproper, we must have  $s' > M(s, m)$ , which means that  
 598  $[s', M(s', m')]$  and  $[s, M(s, m)]$  are disjoint.

599 □

600 Next, we claim that the active intervals  $[s, M(s, m)]$  for  $\text{Base-Alg}(s, m) \in \text{PROPER}(t_\ell, t_{\ell+1}) \cup$   
 601  $\text{SUBPROPER}(t_\ell, t_{\ell+1})$  contain all the rounds where  $a$  is played after being evicted from  $\mathcal{A}_{\text{master}}$ . To  
 602 show this, we first observe that for each round  $t$  when a replay is active, there is a unique proper  
 603 replay associated to  $t$ , namely the proper replay scheduled most recently. Next, note that any round  
 604  $t > t_\ell^a$  where arm  $a \in \mathcal{A}_t$  must belong to the active interval  $[s, M(s, m)]$  of the unique proper replay  
 605  $\text{Base-Alg}(s, m)$  associated to round  $t$ , or else satisfies  $t > M(s, m)$  in which case a unique subproper  
 606 replay  $\text{Base-Alg}(s', m') \in \text{SUBPROPER}(t_\ell, t_{\ell+1})$  was active and not yet permanently interrupted by  
 607 round  $t$ . Thus, it must be the case that  $t \in [s', M(s', m')]$ .

At the same time, every round  $t \in [s, M(s, m)]$  for a proper or subproper  $\text{Base-Alg}(s, m)$  is clearly a round where  $a \in \mathcal{A}_t$  and no such round is accounted for twice by Proposition 12. Thus,

$$\{t \in (t_\ell^a, t_{\ell+1}) : a \in \mathcal{A}_t\} = \bigsqcup_{\text{Base-Alg}(s, m) \in \text{PROPER}(t_\ell, t_{\ell+1}) \cup \text{SUBPROPER}(t_\ell, t_{\ell+1})} [s, M(s, m)].$$

Then, we can rewrite the second double sum in (10) as:

$$\sum_{a=1}^K \sum_{\text{Base-Alg}(s, m) \in \text{PROPER}(t_\ell, t_{\ell+1}) \cup \text{SUBPROPER}(t_\ell, t_{\ell+1})} \mathbf{1}\{B_{s, m} = 1\} \sum_{t=s \vee t_\ell^a}^{M(s, m)} \frac{\delta_t(\hat{a}_t, a)}{|\mathcal{A}_t|}.$$

Recall in the above that the Bernoulli  $B_{s, m}$  (see Line 6 of Algorithm 1) decides whether  $\text{Base-Alg}(s, m)$  is scheduled.

Further bounding the sum over  $t$  above by its positive part, we can expand the sum over  $\text{Base-Alg}(s, m) \in \text{PROPER}(t_\ell, t_{\ell+1}) \cup \text{SUBPROPER}(t_\ell, t_{\ell+1})$  to be over all  $\text{Base-Alg}(s, m)$ , or obtain:

$$\sum_{a=1}^K \sum_{\text{Base-Alg}(s, m)} \mathbf{1}\{B_{s, m} = 1\} \left( \sum_{t=s \vee t_\ell^a}^{M(s, m)} \frac{\delta_t(\hat{a}_t, a)}{|\mathcal{A}_t|} \cdot \mathbf{1}\{a \in \mathcal{A}_t\} \right), \quad (11)$$

where the sum is over all replays  $\text{Base-Alg}(s, m)$ , i.e.  $s \in \{t_\ell + 1, \dots, t_{\ell+1} - 1\}$  and  $m \in \{2, 4, \dots, 2^{\lceil \log(T) \rceil}\}$ . It then remains to bound the contributed relative regret of each  $\text{Base-Alg}(s, m)$  in the interval  $[s \vee t_\ell^a, M(s, m)]$ , which will follow similarly to the previous steps. Fix  $s, m$  and suppose  $t_\ell^a + 1 \leq M(s, m)$  since otherwise  $\text{Base-Alg}(s, m)$  contributes no regret in (11).

Then, following similar reasoning as before, i.e. combining our concentration bound (9) with the eviction criterion (3), we have for a fixed arm  $a$ :

$$\sum_{t=s \vee t_\ell^a}^{M(s, m)} \frac{\delta_t(\hat{a}_t, a)}{|\mathcal{A}_t|} \leq \frac{c_2 \log(T) \sqrt{Km \vee K^2}}{\min_{t \in [s, M(s, m)]} |\mathcal{A}_t|},$$

Plugging this into (11) and switching the ordering of the outer double sum, we obtain (now for clarity overloading the notation  $M(s, m, a)$  to also depend on the reference arm  $a$ ):

$$\sum_{\text{Base-Alg}(s, m)} \mathbf{1}\{B_{s, m} = 1\} \cdot c_2 \log(T) \sqrt{Km \vee K^2} \sum_{a=1}^K \frac{1}{\min_{t \in [s, M(s, m, a)]} |\mathcal{A}_t|}.$$

We claim the above innermost sum over  $a$  is at most  $\log(K)$ . For a fixed  $\text{Base-Alg}(s, m)$ , if  $a_k$  is the  $k$ -th arm in  $[K]$  to be evicted by  $\text{Base-Alg}(s, m)$  or any of its children, then  $\min_{t \in [s, M(s, m, a_k)]} |\mathcal{A}_t| \geq K + 1 - k$ . Thus, our claim follows from  $\sum_{k=1}^K \frac{1}{K+1-k} \leq \log(K)$ .

Let  $R(m) := c_2 \log(K) \log(T) \sqrt{Km \vee K^2}$  which is the bound we've obtained so far on the relative regret for a single  $\text{Base-Alg}(s, m)$ . Then, plugging  $R(m)$  into (11) gives:

$$\begin{aligned} \mathbb{E} \left[ \mathbf{1}\{\mathcal{E}_1\} \sum_{a=1}^K \sum_{t=t_\ell^a}^{t_{\ell+1}-1} \frac{\delta_t(\hat{a}_t, a)}{|\mathcal{A}_t|} \cdot \mathbf{1}\{a \in \mathcal{A}_t\} \right] &\leq \mathbb{E}_{t_\ell} \left[ \mathbb{E} \left[ \sum_{\text{Base-Alg}(s, m)} \mathbf{1}\{B_{s, m} = 1\} \cdot R(m) \mid t_\ell \right] \right] \\ &= \mathbb{E}_{t_\ell} \left[ \sum_{s=t_\ell}^T \sum_m \mathbb{E}[\mathbf{1}\{B_{s, m} = 1\} \cdot \mathbf{1}\{s < t_{\ell+1}\} \mid t_\ell] \cdot R(m) \right]. \end{aligned}$$

Next, we observe that  $B_{s, m}$  and  $\mathbf{1}\{s < t_{\ell+1}\}$  are independent conditional on  $t_\ell$  since  $\mathbf{1}\{s < t_{\ell+1}\}$  only depends on the scheduling and observations of base algorithms scheduled before round  $s$ . Thus, recalling that  $\mathbb{P}(B_{s, m} = 1) = 1/\sqrt{m \cdot (s - t_\ell)}$ ,

$$\begin{aligned} \mathbb{E}[\mathbf{1}\{B_{s, m} = 1\} \cdot \mathbf{1}\{s < t_{\ell+1}\} \mid t_\ell] &= \mathbb{E}[\mathbf{1}\{B_{s, m} = 1\} \mid t_\ell] \cdot \mathbb{E}[\mathbf{1}\{s < t_{\ell+1}\} \mid t_\ell] \\ &= \frac{1}{\sqrt{m \cdot (s - t_\ell)}} \cdot \mathbb{E}[\mathbf{1}\{s < t_{\ell+1}\} \mid t_\ell]. \end{aligned}$$

632 Plugging this into our expectation from before and unconditioning, we obtain:

$$\mathbb{E} \left[ \sum_{s=t_\ell+1}^{t_{\ell+1}-1} \sum_{n=1}^{\lceil \log(T) \rceil} \frac{1}{\sqrt{2^n \cdot (s - t_\ell)}} \cdot R(2^n) \right] \leq c_3 \log^3(T) \mathbb{E}_{t_\ell, t_{\ell+1}} \left[ \sqrt{K(t_{\ell+1} - t_\ell) \vee K^2} \right]. \quad (12)$$

633 Then, it suffices to bound  $\sqrt{K(t_{\ell+1} - t_\ell) \vee K^2}$ . First, we claim that every phase  $[\tau_i, \tau_{i+1})$  is length  
 634 at least  $K/4$ . Observe by our notion of significant regret, that an arm  $a$  incurring significant regret on  
 635 the interval  $[s_1, s_2]$  means

$$\sum_{t=s_1}^{s_2} \delta_t(a_t^*, a) \geq \sqrt{K \cdot (s_2 - s_1)} \implies 2 \cdot (s_2 - s_1) \geq \sqrt{K \cdot (s_2 - s_1)} \implies s_2 - s_1 \geq K/4.$$

636 Thus, each significant phase (Definition 3) must be at least  $K/4$  rounds long meaning  $\tau_{i+1} - \tau_i =$   
 637  $(\tau_{i+1} - \tau_i) \vee K/4$ . This will allow us to remove the “ $\vee K^2$ ” in (12). In particular, since the episode  
 638 length  $t_{\ell+1} - t_\ell$  in (12) can be upper bounded by the combined length of all significant phases  
 639  $[\tau_i, \tau_{i+1})$  intersecting episode  $[t_\ell, t_{\ell+1})$ , (12) gives us the desired bound.

640

#### 641 **B.4 Bounding $\mathbb{E}[\sum_{t=t_\ell}^{t_{\ell+1}-1} \delta_t(a_t^\#, \hat{a}_t)]$ : Regret of Candidate Arm to Safe Arm**

642 We first invoke an elementary lemma based on SST and STI to further help us decompose the regret.

643 **Lemma 13.** *For any three arms  $a, b, c$ , under  $\text{SST} \cap \text{STI}$ :*

$$\delta_t(a, c) \leq 2 \cdot \delta_t(a, b) + \delta_t(b, c) + 3 \cdot \delta_t(a_t^*, a),$$

644 where  $a_t^*$  is the winner arm.

645 *Proof.* We handle all the different orderings:

- 646 (a)  $a \succ_t b, c$ : this already follows from Lemma 8 since then  $\delta_t(a, c) \leq 2 \cdot \delta_t(a, b) + \delta_t(b, c)$ .
- 647 (b)  $c \succ_t a \succ_t b$ :  $\delta_t(a, c) \leq 0 \leq \delta_t(a, b)$  and  $\delta_t(a^*, b) \geq \delta_t(c, b)$  by SST. Summing these  
 648 together gives the result.
- 649 (c)  $b \succ_t a \succ_t c$ :  $\delta_t(a, c) \leq \delta_t(b, c)$  and  $\delta_t(a^*, a) \geq \delta_t(b, a)$  by SST. Summing these together  
 650 gives the result.
- 651 (d)  $b, c \succ_t a$ :  $\delta_t(a^*, a)$  dominates the first two terms on the desired inequality’s RHS.

652

□

653 Then, using Lemma 13, we further decompose the regret about the *last master arm*  $a_\ell$  defined in  
 654 Section 4, which is the last arm to be evicted from  $\mathcal{A}_{\text{master}}$  in episode  $[t_\ell, t_{\ell+1})$ . We have

$$\sum_{t=t_\ell}^{t_{\ell+1}-1} \delta_t(a_t^\#, \hat{a}_t) \leq 2 \sum_{t=t_\ell}^{t_{\ell+1}-1} \delta_t(a_t^\#, a_\ell) + \sum_{t=t_\ell}^{t_{\ell+1}-1} \delta_t(a_\ell, \hat{a}_t) + 3 \sum_{t=t_\ell}^{t_{\ell+1}-1} \delta_t(a_t^*, a_t^\#). \quad (13)$$

655 As said earlier, the sum  $\sum_{t=t_\ell}^{t_{\ell+1}-1} \delta_t(a_t^*, a_t^\#)$  is of the right order. Meanwhile, the sum  
 656  $\sum_{t=t_\ell}^{t_{\ell+1}-1} \delta_t(a_\ell, \hat{a}_t)$  is bounded using our candidate arm switching criterion (4). If  $\hat{a}_t = a_\ell$  for  
 657 every round  $t \in [t_\ell, t_{\ell+1})$  we are already done. Otherwise, let  $m_\ell$  be the last round that  $a_\ell$  is not the  
 658 candidate arm  $\hat{a}_t$ . Then, we must have that since arm  $a_\ell$  is not evicted until round  $t_{\ell+1} - 1$ :

$$\sum_{t=t_\ell}^{t_{\ell+1}-1} \hat{\delta}_t(a_\ell, \hat{a}_t) = \sum_{t=t_\ell}^{m_\ell-1} \hat{\delta}_t(a_\ell, \hat{a}_t) \leq C \log(T) \sqrt{K \cdot (m_\ell - t_\ell) \vee K^2}$$

659 Then, by concentration (Proposition 10) and the fact from earlier that each phase  $[\tau_i, \tau_{i+1})$  is at least  
 660  $K/4$  rounds (so that “ $\vee K^2$ ” can be removed in the above), we have that  $\sum_{t=t_\ell}^{t_{\ell+1}-1} \delta_t(a_\ell, \hat{a}_t)$  is of the  
 661 right order.

662 Then, turning back to (13), it remains to bound the regret of  $a_\ell$  to  $a_t^\#$  over the episode  $[t_\ell, t_{\ell+1})$ .

## 663 B.5 Bounding $\mathbb{E}[\sum_{t=t_\ell}^{t_{\ell+1}-1} \delta_t(a_t^\#, a_\ell)]$ : Regret of Last Master Arm to Safe Arm

664 First, following the outline of Section 4, we recall the definition of the *last safe arm*  $a_t^\#$  at round  $t$   
 665 which is the last arm to incur significant regret in the unique phase  $[\tau_i, \tau_{i+1})$  containing round  $t$ .

666 We next formally define a bad segment, alluded to in Section 4. In what follows, bad segments will  
 667 be defined with respect to a fixed arm  $a$  and conditional on the episode start time  $t_\ell$ . We will then  
 668 show that, with respect to any arm  $a$ , not too many bad segments will elapse before  $a$  is evicted from  
 669  $\mathcal{A}_{\text{master}}$ . In particular, this will hold for  $a = a_\ell$  which will ultimately be used to bound  $\delta_t(a_t^\#, a_\ell)$   
 670 across the episode  $[t_\ell, t_{\ell+1})$ .

671 **Definition 5.** Fix the episode start time  $t_\ell$ , and let  $[\tau_i, \tau_{i+1})$  be any phase intersecting  $[t_\ell, T)$ . For  
 672 any arm  $a$ , define rounds  $s_{i,0}(a), s_{i,1}(a), s_{i,2}(a) \dots \in [t_\ell \vee \tau_i, \tau_{i+1})$  recursively as follows: let  
 673  $s_{i,0}(a) := t_\ell \vee \tau_i$  and define  $s_{i,j}(a)$  as the smallest round in  $(s_{i,j-1}(a), \tau_{i+1})$  such that arm  $a$   
 674 satisfies for some fixed  $c_4 > 0$ :

$$\sum_{t=s_{i,j-1}(a)}^{s_{i,j}(a)} \delta_t(a_t^\#, a) \geq c_4 \log(T) \sqrt{K \cdot (s_{i,j}(a) - s_{i,j-1}(a))}, \quad (14)$$

675 if such a round  $s_{i,j}(a)$  exists. Otherwise, we let the  $s_{i,j}(a) := \tau_{i+1} - 1$ . We refer to any interval  
 676  $[s_{i,j-1}(a), s_{i,j}(a))$  as a **critical segment**, and as a **bad segment** (w.r.t. arm  $a$ ) if (14) above holds.

677 Note that the above definition only depends on the arm  $a$  and the episode start time  $t_\ell$  and that,  
 678 conditional on these variables, they are fixed in the environment. Observe also that the arm  $a_t^\#$  is fixed  
 679 within any critical segment  $[s_{i,j-1}(a), s_{i,j}(a)) \subseteq [\tau_i, \tau_{i+1})$  since a significant shift does not occur  
 680 inside  $[\tau_i, \tau_{i+1})$ .

681 Now relating this notion of a bad segment to our goal of bounding regret, a given bad segment  
 682  $[s_{i,j}(a), s_{i,j+1}(a))$  only contributes order  $\sqrt{K \cdot (s_{i,j+1}(a) - s_{i,j}(a))}$  to the regret of  $a$  to  $a_t^\#$ . At the  
 683 same time, we claim that a well-timed replay (see Definition 6 below) running from  $s_{i,j-1}(a)$  to  
 684  $s_{i,j}(a)$  is capable of evicting arm  $a$ . This in turn allows us to reduce the regret bounding to studying  
 685 the number and lengths of bad segments which elapse before one is detected by such a replay.

686 We first define such a well-timed and *perfect* replay.

687 **Definition 6.** Let  $\tilde{s}_{i,j}(a) := \lceil \frac{s_{i,j}(a) + s_{i,j+1}(a)}{2} \rceil$  denote the approximate midpoint of  
 688  $[s_{i,j}(a), s_{i,j+1}(a))$ . Given a bad segment  $[s_{i,j}(a), s_{i,j+1}(a))$ , define a **perfect replay** w.r.t.  
 689  $[s_{i,j}(a), s_{i,j+1}(a))$  as a call of  $\text{Base-Alg}(t_{\text{start}}, m)$  where  $t_{\text{start}} \in [s_{i,j}(a), \tilde{s}_{i,j}(a)]$  and  $m \geq$   
 690  $s_{i,j+1}(a) - s_{i,j}(a)$ .

691 Next, we analyze the behavior of a perfect replay on the bad segment  $[s_{i,j}(a), s_{i,j+1}(a))$ . Going  
 692 forward, we will use the simpler notation  $a_i^\#$  to denote the last safe arm of a phase  $[\tau_i, \tau_{i+1})$ , known  
 693 in context.

694 **Proposition 14.** Suppose the good event  $\mathcal{E}_1$  holds (cf. Proposition 10). Let  $[s_{i,j}(a), s_{i,j+1}(a))$  be  
 695 a bad segment with respect to arm  $a$ . Fix an integer  $m \geq s_{i,j+1}(a) - s_{i,j}(a)$ . Then, if a perfect  
 696 replay with respect to  $[s_{i,j}(a), s_{i,j+1}(a))$  is scheduled, arm  $a$  will be evicted from  $\mathcal{A}_{\text{master}}$  by round  
 697  $s_{i,j+1}(a)$ .

698 *Proof.* Suppose event  $\mathcal{E}_1$  (i.e., our concentration bound (9)) holds. We first observe that by elementary  
 699 calculations and the definition of the rounds  $s_{i,j}(a)$ , we have (in an identical fashion to Lemma 4 of  
 700 Suk and Kpotufe [30]):

$$\sum_{t=\tilde{s}_{i,j}(a)}^{s_{i,j+1}(a)} \delta_t(a_i^\#, a) \geq \frac{c_4}{4} \log(T) \sqrt{K (s_{i,j+1}(a) - \tilde{s}_{i,j}(a))}, \quad (15)$$

701 where  $\tilde{s}_{i,j}(a)$  is the midpoint of  $[s_{i,j}(a), s_{i,j+1}(a))$  as defined in Definition 6. The above will come  
 702 in handy in asserting that arm  $a$  is in fact evicted over just the second half of the bad segment  
 703  $[\tilde{s}_{i,j}(a), s_{i,j+1}(a)]$ .

704 Next, following the intuition given in Section 4, in order to relate  $\delta_t(a_i^\#, a)$  to  $\delta_t(\hat{a}_t, a)$ , we again use  
 705 SST and STI via Lemma 13 on inequality (15):

$$\sum_{t=\tilde{s}_{i,j}(a)}^{s_{i,j+1}(a)} 2 \cdot \delta_t(a_i^\#, \hat{a}_t) + \delta_t(\hat{a}_t, a) + 3 \cdot \delta_t(a_t^*, a_i^\#) \geq \frac{c_4}{4} \log(T) \sqrt{K(s_{i,j+1}(a) - \tilde{s}_{i,j}(a))}. \quad (16)$$

706 We next show that  $\sum_{t=\tilde{s}_{i,j}(a)}^{s_{i,j+1}(a)} \delta_t(a_i^\#, \hat{a}_t)$  and  $\sum_{t=\tilde{s}_{i,j}(a)}^{s_{i,j+1}(a)} \delta_t(a_t^*, a_i^\#)$  on the above LHS are small.

707 First, it is clear that any perfect replay  $\text{Base-Alg}(t_{\text{start}}, m)$  will not evict  $a_i^\#$  since otherwise it incurs  
 708 significant regret within phase  $[\tau_i, \tau_{i+1})$  (see the earlier Lemma 11). At the same time, by the  
 709 candidate arm switching criterion (4) and concentration:

$$\sum_{t=\tilde{s}_{i,j}(a)}^{s_{i,j+1}(a)} \delta_t(a_i^\#, \hat{a}_t) \leq c_5 \log(T) \sqrt{K(s_{i,j+1}(a) - \tilde{s}_{i,j}(a))}.$$

710 Meanwhile, by the definition of significant regret (Definition 3),

$$\sum_{t=\tilde{s}_{i,j}(a)}^{s_{i,j+1}(a)} \delta_t(a_t^*, a_i^\#) \geq \sqrt{K(s_{i,j+1}(a) - \tilde{s}_{i,j}(a))}.$$

711 Thus, for sufficiently large  $c_4 > 0$  in the definition of bad segments (Definition 5), we have that the  
 712 above two inequalities can be combined with (16) to yield:

$$\sum_{t=\tilde{s}_{i,j}(a)}^{s_{i,j+1}(a)} \delta_t(\hat{a}_t, a) \geq \sqrt{K(s_{i,j+1}(a) - \tilde{s}_{i,j}(a))}.$$

713 If arm  $a$  is evicted from  $\mathcal{A}_{\text{master}}$  before round  $s_{i,j+1}(a)$ , then we are already done. Otherwise, using  
 714 the fact that  $\mathbb{E}[\hat{\delta}_t(\hat{a}_t, a) | \mathcal{F}_{t-1}] = \delta_t(\hat{a}_t, a)$  for any round  $t \in [\tilde{s}_{i,j}(a), s_{i,j+1}(a)]$  with  $a \in \mathcal{A}_t$ , we  
 715 have that arm  $a$  will be evicted at round  $s_{i,j+1}(a)$  using the above inequality and concentration.  $\square$

716 It remains to show that, for any arm  $a$ , a perfect replay is scheduled w.h.p. before too much regret is  
 717 incurred on the elapsed bad segments w.r.t.  $a$ . In particular, this will hold for the last master arm  $a_\ell$ ,  
 718 allowing us to bound the remaining term  $\mathbb{E}[\sum_{t=t_\ell}^{t_{\ell+1}-1} \delta_t(a_t^\#, a_\ell)]$ . The argument will be identical to  
 719 that of Appendix B.2 of Suk and Kpotufe [30].

720 First, fix an arm  $a$  and an episode start time  $t_\ell$ . Then, define the *bad round*  $s(a) > t_\ell$  as follows:

721 **Definition 7.** (*bad round*) For a fixed round  $t_\ell$  and arm  $a$ , the **bad round**  $s(a) > t_\ell$  is defined as the  
 722 smallest round which satisfies, for some fixed  $c_6 > 0$ :

$$\sum_{(i,j)} \sqrt{s_{i,j+1}(a) - s_{i,j}(a)} > c_6 \log(T) \sqrt{s(a) - t_\ell}, \quad (17)$$

723 where the above sum is over all pairs of indices  $(i, j) \in \mathbb{N} \times \mathbb{N}$  such that  $[s_{i,j}(a), s_{i,j+1}(a))$  is a bad  
 724 segment with  $s_{i,j+1}(a) < s(a)$ .

725 Our goal is then to show that arm  $a$  is evicted by some perfect replay scheduled within episode  
 726  $[t_\ell, t_{\ell+1})$  with high probability before the bad round  $s(a)$  occurs. Going forward, to simplify notation  
 727 we will drop the dependence on the fixed arm  $a$  in some variables.

728 For each bad segment  $[s_{i,j}(a), s_{i,j+1}(a))$ , recall that  $\tilde{s}_{i,j}(a)$  is the approximate midpoint between  
 729  $s_{i,j}(a)$  and  $s_{i,j+1}(a)$  (see Definition 6). Next, let  $m_{i,j} := 2^n$  where  $n \in \mathbb{N}$  satisfies:

$$2^n \geq s_{i,j+1}(a) - s_{i,j}(a) > 2^{n-1}.$$

730 Plainly,  $m_{i,j}$  is a dyadic approximation of the bad segment length. Next, recall that the Bernoulli  
 731  $B_{t,m}$  decides whether  $\text{Base-Alg}(t, m)$  is scheduled at round  $t$  (see Line 6 of Algorithm 1). If for  
 732 some  $t \in [s_{i,j}(a), \tilde{s}_{i,j}(a)]$ ,  $B_{t,m_{i,j}} = 1$ , i.e. a perfect replay is scheduled, then  $a$  will be evicted from  
 733  $\mathcal{A}_{\text{master}}$  by round  $s_{i,j+1}(a)$  (Proposition 14). We will show this happens with high probability via  
 734 concentration on the sum

$$S(a, t_\ell) := \sum_{(i,j): s_{i,j+1}(a) < s(a)} \sum_{t=\tilde{s}_{i,j}(a)}^{\tilde{s}_{i,j}(a)} B_{t,m_{i,j}},$$

735 Note that the random variable  $S(a, t_\ell)$  only depends on the replay scheduling probabilities  $\{B_{s,m}\}_{s,m}$   
 736 given a fixed arm  $a$  and episode start time  $t_\ell$ , since the bad round  $s(a)$  is also fixed given these  
 737 quantities. This means that  $S(a, t_\ell)$  is an independent sum of Bernoulli random variables  $B_{t,m_{i,j}}$ ,  
 738 conditional on  $t_\ell$ . Then, a Chernoff bound over the randomness of  $S(a, t_\ell)$ , conditional on  $t_\ell$  yields

$$\mathbb{P}\left(S(a, t_\ell) \leq \frac{\mathbb{E}[S(a, t_\ell) \mid t_\ell]}{2} \mid t_\ell\right) \leq \exp\left(-\frac{\mathbb{E}[S(a, t_\ell) \mid t_\ell]}{8}\right).$$

739 The above RHS error probability is bounded above above by  $1/T^3$  by observing:

$$\mathbb{E}[S(a, t_\ell) \mid t_\ell] \geq \sum_{(i,j)} \sum_{t=s_{i,j}(a)}^{\tilde{s}_{i,j}(a)} \frac{1}{\sqrt{m_{i,j} \cdot (t - t_\ell)}} \geq \frac{1}{4} \sum_{(i,j)} \sqrt{\frac{s_{i,j+1}(a) - s_{i,j}(a)}{s(a) - t_\ell}} \geq \frac{c_6}{4} \log(T),$$

740 for  $c_6 > 0$  large enough, where the last inequality follows from (17) in the definition of the bad  
 741 round  $s(a)$  (Definition 7). Taking a further union bound over the choice of arm  $a \in [K]$  gives us that  
 742  $S(a, t_\ell) > 1$  for all choices of arm  $a$  (define this as the good event  $\mathcal{E}_2(t_\ell)$ ) with probability at least  
 743  $1 - K/T^3$ . This means arm  $a$  will be evicted before round  $s(a)$  with high probability.

744 Recall on the event  $\mathcal{E}_1$  the concentration bounds of Proposition 10 hold. Then, on  $\mathcal{E}_1 \cap \mathcal{E}_2(t_\ell)$ , letting  
 745  $a = a_\ell$  in the preceding arguments we must have  $t_{\ell+1} - 1 \leq s(a_\ell)$ . Thus, by the definition of the bad  
 746 round  $s(a_\ell)$  (Definition 7), we must have:

$$\sum_{[s_{i,j}(a_\ell), s_{i,j+1}(a_\ell)) : s_{i,j+1}(a_\ell) < t_{\ell+1} - 1} \sqrt{s_{i,j+1}(a_\ell) - s_{i,j}(a_\ell)} \leq c_6 \log(T) \sqrt{t_{\ell+1} - t_\ell}. \quad (18)$$

747 Thus, by (14) in the definition of bad segments (Definition 5), over the bad segments  
 748  $[s_{i,j}(a_\ell), s_{i,j+1}(a_\ell))$  which elapse before the end of the episode  $t_{\ell+1} - 1$ , the regret of  $a_\ell$  to  $a_t^\sharp$   
 749 is at most order  $\log^2(T) \sqrt{K \cdot (t_{\ell+1} - t_\ell)}$ .

750 Over each non-bad critical segment  $[s_{i,j}(a_\ell), s_{i,j+1}(a_\ell))$ , the regret of playing arm  $a_\ell$  to  $a_t^\sharp$  is at most  
 751  $\log(T) \sqrt{\tau_{i+1} - \tau_i}$  since there is at most one non-bad critical segment per phase  $[\tau_i, \tau_{i+1})$  (follows  
 752 from Definition 5).

753 So, we conclude that on event  $\mathcal{E}_1 \cap \mathcal{E}_2(t_\ell)$ :

$$\sum_{t=t_\ell}^{t_{\ell+1}-1} \delta_t(a_t^\sharp, a_\ell) \leq c_7 \log^2(T) \sum_{i \in \text{PHASES}(t_\ell, t_{\ell+1})} \sqrt{K(\tau_{i+1} - \tau_i)}.$$

754 Taking expectation, we have by conditioning first on  $t_\ell$  and then on event  $\mathcal{E}_1 \cap \mathcal{E}_2(t_\ell)$ :

$$\begin{aligned} \mathbb{E}\left[\sum_{t=t_\ell}^{t_{\ell+1}-1} \delta_t(a_t^\sharp, a_\ell)\right] &\leq \mathbb{E}_{t_\ell}\left[\mathbb{E}\left[\mathbf{1}\{\mathcal{E}_1 \cap \mathcal{E}_2(t_\ell)\} \sum_{t=t_\ell}^{t_{\ell+1}-1} \delta_t(a_t^\sharp, a_\ell) \mid t_\ell\right]\right] + T \cdot \mathbb{E}_{t_\ell}\left[\mathbb{E}\left[\mathbf{1}\{\mathcal{E}_1^c \cup \mathcal{E}_2^c(t_\ell)\} \mid t_\ell\right]\right] \\ &\leq c_7 \log^2(T) \mathbb{E}_{t_\ell}\left[\mathbb{E}\left[\mathbf{1}\{\mathcal{E}_1 \cap \mathcal{E}_2(t_\ell)\} \sum_{i \in \text{PHASES}(t_\ell, t_{\ell+1})} \sqrt{K(\tau_{i+1} - \tau_i)} \mid t_\ell\right]\right] + \frac{2K}{T^2} \\ &\leq c_7 \log^2(T) \mathbb{E}\left[\mathbf{1}\{\mathcal{E}_1\} \sum_{i \in \text{PHASES}(t_\ell, t_{\ell+1})} \sqrt{\tau_{i+1} - \tau_i}\right] + \frac{2}{T}, \end{aligned}$$

755 where in the last step we bound  $\mathbf{1}\{\mathcal{E}_1 \cap \mathcal{E}_2(t_\ell)\} \leq \mathbf{1}\{\mathcal{E}_1\}$  and apply tower law again. This concludes  
 756 the proof.  $\blacksquare$
